# Supplementary material for: Identifying potential prescribing safety indicators related to mental health disorders and medications: A systematic review
Source: PubMed Central journal article supplement (PMC6534318; doi:10.1371/journal.pone.0217406), 2019-05-24
Supplement: pone.0217406.s001.pdf [file pone.0217406.s001.pdf]

Database(s): **Embase**

Search Strategy:

| #  | Searches                                                                   |
|----|----------------------------------------------------------------------------|
| 1  | medication safety.mp.                                                      |
| 2  | medication error*.mp. or exp medication error/                             |
| 3  | prescribing error*.mp.                                                     |
| 4  | prescription error*.mp.                                                    |
| 5  | prescribing fault*.mp.                                                     |
| 6  | monitoring error*.mp.                                                      |
| 7  | inappropriate prescribing.mp. or exp inappropriate prescribing/            |
| 8  | inappropriate medication*.mp. or exp potentially inappropriate medication/ |
| 9  | irrational prescribing.mp.                                                 |
| 10 | prescribing appropriateness.mp.                                            |
| 11 | appropriate prescribing.mp.                                                |
| 12 | hazardous prescribing.mp.                                                  |
| 13 | drug-related morbidity.mp.                                                 |
| 14 | (prescribing adj3 safety).mp.                                              |
| 15 | (prescribing adj3 quality).mp.                                             |
| 16 | (inappropriate adj3 prescribing).mp.                                       |
| 17 | high risk prescribing.mp.                                                  |
| 18 | high risk medication*.mp.                                                  |
| 19 | prescription error*.mp.                                                    |
| 20 | Medication related problem*.mp.                                            |
| 21 | Drug related problem*.mp.                                                  |
| 22 | Guideline*.mp.                                                             |
| 23 | quality assurance.mp.                                                      |
| 24 | tool*.mp.                                                                  |
| 25 | toolkit*.mp.                                                               |
| 26 | criteri*.mp.                                                               |
| 27 | instrument*.mp.                                                            |
| 28 | scale*.mp.                                                                 |
| 29 | screen*.mp.                                                                |
| 30 | indicator*.mp.                                                             |
| 31 | measur*.mp.                                                                |
| 32 | list.mp.                                                                   |

|    |                                                                                                                   |
|----|-------------------------------------------------------------------------------------------------------------------|
| 33 | outcome assessment*.mp.                                                                                           |
| 34 | patient reported outcome*.mp.                                                                                     |
| 46 | exp indicator/ or exp outcome assessment/ or exp patient reported outcome/                                        |
| 35 | creat*.mp.                                                                                                        |
| 36 | updat*.mp.                                                                                                        |
| 37 | develop*.mp.                                                                                                      |
| 38 | valid*.mp.                                                                                                        |
| 39 | design*.mp.                                                                                                       |
| 40 | consensus*.mp.                                                                                                    |
| 41 | Delphi.mp.                                                                                                        |
| 42 | rand appropriate*.mp.                                                                                             |
| 43 | revis*.mp.                                                                                                        |
| 44 | Amend*.mp.                                                                                                        |
| 45 | nominal group technique.mp.                                                                                       |
| 47 | 22 or 23 or 24 or 25 or 26 or 27 or 28 or 29 or 30 or 31 or 32 or 33 or 34 or 46                                  |
| 48 | 35 or 36 or 37 or 38 or 39 or 40 or 41 or 42 or 43 or 44 or 45                                                    |
| 49 | 1 or 2 or 3 or 4 or 5 or 6 or 7 or 8 or 9 or 10 or 11 or 12 or 13 or 14 or 15 or 16 or 17 or 18 or 19 or 20 or 21 |
| 50 | 47 and 48 and 49                                                                                                  |
| 51 | limit 50 to yr="1990 -Current"                                                                                    |
