# Supplementary material for: Identifying potential prescribing safety indicators related to mental health disorders and medications: A systematic review
Source: PubMed Central journal article supplement (PMC6534318; doi:10.1371/journal.pone.0217406), 2019-05-24
Supplement: pone.0217406.s002.pdf [file pone.0217406.s002.pdf]

# List of prescribing indicators related to mental health medications and conditions

## PIM: Independent of Diagnoses or Conditions

Prescribing [Class/Medication] to a patient aged [Age]

**Table 1: PIM: Independent of Diagnoses or Conditions (Antipsychotics)**

| Class/Medication                  | Age  | References                       |
|-----------------------------------|------|----------------------------------|
| <b>Antipsychotics</b>             | ≥ 65 | [25, 34, 38, 42, 43]             |
|                                   | ≥ 70 | [95]                             |
|                                   | 0-5  | [69]                             |
|                                   | NH   | [92]                             |
| <i>Atypical antipsychotics</i>    | ≥ 65 | [31, 32]                         |
| <i>Aripiprazole</i>               | ≥ 65 | [46, 91]                         |
| <i>Asenapine</i>                  | ≥ 65 | [91]                             |
| <i>Chlorpromazine</i>             | ≥ 65 | [46, 47, 66, 84, 91, 116]        |
|                                   | ≥ 70 | [96]                             |
|                                   | ≥ 75 | [87]                             |
| <i>Chlorprothixen</i>             | ≥ 65 | [46]                             |
|                                   | ≥ 70 | [96]                             |
| <i>Clozapine</i>                  | ≥ 65 | [45-47, 66, 77, 84, 90, 91, 116] |
| <i>Cyanemazine</i>                | ≥ 65 | [46]                             |
|                                   | ≥ 75 | [87]                             |
| <i>Droperidol</i>                 | ≥ 65 | [46]                             |
| <i>Flupentixol</i>                | ≥ 65 | [46]                             |
| <i>Fluphenazine</i>               | ≥ 65 | [45, 46, 90]                     |
|                                   | ≥ 75 | [87]                             |
| <i>Haloperidol</i>                | ≥ 65 | [84, 90, 91, 116]                |
|                                   | ≥ 65 | [46, 47, 66, 91]                 |
|                                   | ≥ 70 | [96]                             |
| <i>Levomepromazine</i>            | ≥ 75 | [87]                             |
|                                   | ≥ 65 | [46, 66]                         |
| <i>Olanzapine</i>                 | ≥ 65 | [84, 90, 91, 116]                |
| <i>Paliperidone</i>               | ≥ 65 | [91]                             |
| <i>Perphenazine</i>               | ≥ 65 | [45, 46, 90, 91]                 |
|                                   | ≥ 75 | [87]                             |
| <i>Pimozide</i>                   | ≥ 65 | [46, 91]                         |
| <i>Pipotiazine</i>                | ≥ 65 | [46, 91]                         |
|                                   | ≥ 75 | [87]                             |
| <i>Prochlorperazine</i>           | ≥ 65 | [46]                             |
|                                   | ≥ 70 | [96]                             |
| <i>Propiciazine (periciazine)</i> | ≥ 65 | [46, 91]                         |
|                                   | ≥ 75 | [87]                             |
| <i>Prothipendyl</i>               | ≥ 65 | [90]                             |
| <i>Risperidone</i>                | ≥ 65 | [84, 91, 116]                    |
| <i>Reserpine</i>                  | ≥ 65 | [41, 46, 66, 118]                |
|                                   | ≥ 75 | [87]                             |
| <i>Sertindole</i>                 | ≥ 65 | [46]                             |
| <i>Sulpiride</i>                  | ≥ 75 | [85]                             |
| <i>Thioridazine</i>               | ≥ 65 | [46, 66, 91, 116]                |
| <i>Trifluoperazine</i>            | ≥ 65 | [46, 91]                         |
| <i>Ziprasidone</i>                | ≥ 65 | [46, 91]                         |
| <i>Zuclopenthixol</i>             | ≥ 65 | [46, 84]                         |

**Table 2: PIM: Independent of Diagnoses or Conditions (Antidepressants)**

| Class/Medication       | Age  | References                                                      |
|------------------------|------|-----------------------------------------------------------------|
| <b>Antidepressants</b> | ≥ 65 | [42]                                                            |
|                        | 0-5  | [69]                                                            |
|                        | NH   | [92]                                                            |
| <b>TCA</b>             | ≥ 65 | [32, 34, 38, 65]                                                |
|                        | ≥ 70 | [95]                                                            |
|                        | ≥ 75 | [73, 85]                                                        |
|                        | ≤ 18 | [103]                                                           |
| <i>Amitriptyline</i>   | ≥ 65 | [31, 34, 41, 45-47, 66, 77, 84, 90, 91, 93, 106, 108, 116, 118] |
|                        | ≥ 70 | [96]                                                            |
|                        | ≥ 75 | [87]                                                            |

|                                   |      |                                              |
|-----------------------------------|------|----------------------------------------------|
| <i>Amoxapine</i>                  | ≥ 65 | [34, 46, 84]                                 |
|                                   | ≥ 75 | [87]                                         |
| <i>Clomipramine</i>               | ≥ 65 | [34, 45-47, 66, 77, 84, 90, 91]              |
|                                   | ≥ 70 | [96]                                         |
|                                   | ≥ 75 | [87]                                         |
| <i>Desipramine</i>                | ≥ 65 | [34, 46]                                     |
| <i>Dosulepin</i>                  | ≥ 65 | [46, 47, 66]                                 |
|                                   | ≥ 75 | [87]                                         |
| <i>Doxepin</i>                    | ≥ 65 | [41, 45, 46, 66, 77, 90, 106, 108, 116, 118] |
|                                   | ≥ 70 | [96]                                         |
|                                   | ≥ 75 | [87]                                         |
| <i>Imipramine</i>                 | ≥ 65 | [34, 45-47, 66, 77, 84, 91, 93, 116]         |
|                                   | ≥ 75 | [87]                                         |
| <i>Maprotiline</i>                | ≥ 65 | [45, 46, 77, 90]                             |
|                                   | ≥ 75 | [87]                                         |
| <i>Melitracen</i>                 | ≥ 65 | [66]                                         |
| <i>Nortriptyline</i>              | ≥ 65 | [34, 46, 84, 91]                             |
| <i>Protriptyline</i>              | ≥ 65 | [34]                                         |
| <i>Trimipramine</i>               | ≥ 65 | [34, 45, 46, 77]                             |
|                                   | ≥ 70 | [96]                                         |
|                                   | ≥ 75 | [87]                                         |
| <b>SSRI/SNRI</b>                  | ≥ 65 | [34]                                         |
| <i>SSRI other than fluoxetine</i> | ≤ 18 | [73, 103]                                    |
| <i>Fluvoxamine</i>                | ≥ 65 | [46, 90]                                     |
| <i>Fluoxetine</i>                 | ≥ 65 | [31, 45-47, 77, 91]                          |
|                                   | ≤ 18 | [73]                                         |
| <i>Paroxetine</i>                 | ≥ 65 | [34, 46]                                     |
| <i>Venlafaxine</i>                | ≥ 65 | [46]                                         |
| <i>NDRI (Bupropion)</i>           | ≥ 65 | [46]                                         |
| <i>NRI (Reboxetine)</i>           | ≥ 65 | [46]                                         |
| <i>MAOi (Tranlycypromine)</i>     | ≥ 65 | [45, 46, 77, 91]                             |
| <i>MAOi (Bifemelane)</i>          | ≥ 65 | [91]                                         |

MAOi: Monoamine oxidase inhibitor. NDRI: Norepinephrine–dopamine reuptake inhibitor. NRI: Norepinephrine reuptake inhibitor. SNRI: Serotonin and norepinephrine reuptake inhibitors. SSRI: Selective serotonin reuptake inhibitor. TCA: Tricyclic antidepressants.

**Table 3: PIM: Independent of Diagnoses or Conditions (Sedative, hypnotics and anxiolytics)**

| Class/Medication                           | Age  | References                                     |
|--------------------------------------------|------|------------------------------------------------|
| <b>Long acting Hypnotics or anxiolytic</b> | ≥ 65 | [38, 65]                                       |
| <b>Benzodiazepine</b>                      | ≥ 65 | [25, 42, 43, 68]                               |
|                                            | ≥ 75 | [85]                                           |
|                                            | NH   | [92]                                           |
| <i>long acting benzodiazepine</i>          | ≥ 65 | [41, 48, 73, 74, 107, 108, 112]                |
|                                            | ≥ 75 | [87]                                           |
| <i>short acting benzodiazepine</i>         | ≥ 65 | [48]                                           |
|                                            | ≥ 75 | [73]                                           |
| <i>Other than Temazepam or Zolpidem.</i>   | ≥ 65 | [92]                                           |
| <i>Alprazolam</i>                          | ≥ 65 | [34, 45, 46, 84, 91, 116]                      |
| <i>Brotizolam</i>                          | ≥ 65 | [90]                                           |
| <i>Bromazepam</i>                          | ≥ 65 | [45, 46, 84, 90, 91]                           |
| <i>Chlordiazepoxide</i>                    | ≥ 65 | [34, 39, 45-47, 66, 84, 90, 91, 106, 116, 118] |
| <i>Clobazam</i>                            | ≥ 65 | [45-47, 66, 84, 90, 91]                        |
| <i>Clonazepam</i>                          | ≥ 65 | [34, 46, 66, 84, 90, 91]                       |
| <i>Clorazepate</i>                         | ≥ 65 | [34, 45, 46, 66, 90, 91]                       |
| <i>Diazepam</i>                            | ≥ 65 | [34, 39, 45-47, 66, 84, 90, 91, 106, 116, 118] |
|                                            | ≥ 70 | [95, 96]                                       |
| <i>Estazolam</i>                           | ≥ 65 | [34]                                           |
| <i>Fludiazepam</i>                         | ≥ 65 | [66]                                           |
| <i>Flunitrazepam</i>                       | ≥ 65 | [45, 46, 66, 84, 90, 91]                       |
|                                            | ≥ 70 | [95, 96]                                       |
| <i>Flurazepam</i>                          | ≥ 65 | [34, 39, 41, 45, 46, 66, 84, 106, 116, 118]    |
| <i>Halazepam</i>                           | ≥ 65 | [46]                                           |
| <i>Loflazepate</i>                         | ≥ 65 | [46]                                           |
| <i>Lorazepam</i>                           | ≥ 65 | [34, 84, 90, 91, 116]                          |
| <i>Medazepam</i>                           | ≥ 65 | [45-47]                                        |
| <i>Midazolam</i>                           | ≥ 65 | [46, 47]                                       |
| <i>Nitrazepam</i>                          | ≥ 65 | [45, 46, 66, 90]                               |
|                                            | ≥ 70 | [95, 96]                                       |
| <i>Nordazepam</i>                          | ≥ 65 | [46, 66]                                       |
| <i>Oxazepam</i>                            | ≥ 65 | [34, 90, 91]                                   |
| <i>Oxazolam</i>                            | ≥ 65 | [66]                                           |
| <i>Prazepam</i>                            | ≥ 65 | [45, 46, 90]                                   |

|                                        |      |                               |
|----------------------------------------|------|-------------------------------|
| <i>Quazepam</i>                        | ≥ 65 | [34, 46]                      |
| <i>Temazepam</i>                       | ≥ 65 | [34, 45, 46, 84]              |
| <i>Triazolam</i>                       | ≥ 65 | [34, 45, 46, 84, 90, 116]     |
| <b>Z-drugs</b>                         | ≥ 65 | [25, 42]                      |
|                                        | ≥ 75 | [73, 85]                      |
| <i>Eszopiclone</i>                     | ≥ 65 | [34, 91]                      |
| <i>Zaleplon</i>                        | ≥ 65 | [34, 91]                      |
| <i>Zolpidem</i>                        | ≥ 65 | [34, 84, 91]                  |
| <i>Zopiclone</i>                       | ≥ 65 | [91]                          |
| <b>Barbiturates</b>                    | ≥ 65 | [39, 118]                     |
| <i>Amobarbital</i>                     | ≥ 65 | [66]                          |
| <i>Butobarbital</i>                    | ≥ 65 | [34]                          |
| <i>Butalbital</i>                      | ≥ 65 | [34]                          |
| <i>Mephobarbital</i>                   | ≥ 65 | [34]                          |
| <i>Pentobarbital</i>                   | ≥ 65 | [34, 45, 66, 91]              |
| <i>Phenobarbital</i>                   | ≥ 65 | [34, 41, 46, 48, 90, 91, 116] |
| <i>Secobarbital</i>                    | ≥ 65 | [34, 41, 66]                  |
| <i>Thiopental</i>                      | ≥ 65 | [91]                          |
| <i>Chloral hydrate</i>                 | ≥ 65 | [41, 45, 46]                  |
| <i>Clomethiazole</i>                   | ≥ 65 | [46]                          |
|                                        | ≥ 70 | [95]                          |
| <i>Meprobamate</i>                     | ≥ 65 | [34, 39, 41, 46, 66, 118]     |
| <i>First-generation antihistamines</i> | ≥ 65 | [25, 42, 43]                  |
|                                        | ≥ 70 | [95]                          |
| <i>Sedating antihistamine</i>          | ≥ 65 | [48]                          |
| <i>Alimemazine</i>                     | ≥ 75 | [87]                          |
|                                        | ≥ 70 | [96]                          |
|                                        | ≥ 65 | [46, 66, 108]                 |
| <i>Azatadine</i>                       | ≥ 65 | [66]                          |
| <i>Brompheniramine</i>                 | ≥ 65 | [34, 46, 66, 91]              |
|                                        | ≥ 75 | [87]                          |
| <i>Bucizine</i>                        | ≥ 65 | [46, 66]                      |
|                                        | ≥ 75 | [87]                          |
| <i>Carbinoxamine</i>                   | ≥ 65 | [34, 46, 66, 91]              |
|                                        | ≥ 75 | [87]                          |
| <i>Chlorcyclizine</i>                  | ≥ 65 | [66]                          |
| <i>Chlorpheniramine</i>                | ≥ 65 | [34, 46, 66, 84, 91, 118]     |
|                                        | ≥ 75 | [85, 87]                      |
| <i>Chlorphenoxamine</i>                | ≥ 65 | [66]                          |
| <i>Clemastine</i>                      | ≥ 65 | [34, 46, 47, 66]              |
| <i>Cyclizine</i>                       | ≥ 65 | [46, 66]                      |
| <i>Cyproheptadine</i>                  | ≥ 65 | [34, 46, 47, 66, 91, 118]     |
|                                        | ≥ 75 | [87]                          |
| <i>Dexbrompheniramine</i>              | ≥ 65 | [34]                          |
| <i>Dexchlorpheniramine</i>             | ≥ 65 | [34, 46, 66, 91]              |
|                                        | ≥ 70 | [96]                          |
|                                        | ≥ 75 | [87]                          |
| <i>Dimenhydrinate</i>                  | ≥ 65 | [34, 46, 47, 84]              |
|                                        | ≥ 75 | [87]                          |
| <i>Dimetindene</i>                     | ≥ 65 | [46]                          |
| <i>Diphenhydramine</i>                 | ≥ 65 | [34, 45, 46, 66, 84, 91, 118] |
|                                        | ≥ 75 | [85, 87]                      |
| <i>Diphenylpyraline</i>                | ≥ 65 | [66]                          |
| <i>Doxylamine</i>                      | ≥ 65 | [34, 45, 46, 66, 91]          |
|                                        | ≥ 75 | [87]                          |
| <i>Ebastine</i>                        | ≥ 65 | [46]                          |
| <i>Homochlorcyclizine</i>              | ≥ 65 | [66]                          |
| <i>Hydroxyzine</i>                     | ≥ 65 | [34, 46, 47, 77, 84, 91, 118] |
|                                        | ≥ 70 | [96]                          |
|                                        | ≥ 75 | [87]                          |
| <i>Ketotifen</i>                       | ≥ 65 | [66]                          |
| <i>Mebhydrolin</i>                     | ≥ 65 | [66]                          |
| <i>Meclizine</i>                       | ≥ 65 | [34, 46, 66]                  |
| <i>Mepyramine</i>                      | ≥ 65 | [66]                          |
| <i>Mequitazine</i>                     | ≥ 65 | [46, 66, 91]                  |
|                                        | ≥ 75 | [87]                          |
| <i>Oxomemazine</i>                     | ≥ 65 | [46]                          |
| <i>Oxatomide</i>                       | ≥ 65 | [66]                          |
| <i>Phenindamine</i>                    | ≥ 65 | [66]                          |
| <i>Pheniramine</i>                     | ≥ 65 | [66]                          |
|                                        | ≥ 75 | [87]                          |

|                       |      |                                |
|-----------------------|------|--------------------------------|
| <i>Pimethixene</i>    | ≥ 65 | [46]                           |
| <i>Promethazine</i>   | ≥ 65 | [34, 46, 47, 66, 91, 108, 118] |
|                       | ≥ 70 | [96]                           |
|                       | ≥ 75 | [87]                           |
| <i>Propiomazine</i>   | ≥ 65 | [46]                           |
| <i>Terfenadine</i>    | ≥ 65 | [46]                           |
| <i>Tripelennamine</i> | > 65 | [46, 66]                       |
| <i>Triprolidine</i>   | ≥ 65 | [34, 46, 66, 84]               |
|                       | ≥ 75 | [85]                           |
| <i>Aceprometazine</i> | ≥ 65 | [46]                           |
|                       | ≥ 75 | [87]                           |
| <i>Phenothiazine</i>  | ≤ 20 | [73]                           |
|                       | ≥ 65 | [32]                           |
| <i>Propranolol</i>    | ≥ 65 | [41, 46]                       |

**Table 4: PIM: Independent of Diagnoses or Conditions (Anti-dementia)**

| Class/Medication                     | Age  | References            |
|--------------------------------------|------|-----------------------|
| <i>Anticholinesterase inhibitors</i> | ≥ 70 | [95]                  |
| <i>Aniracetam</i>                    | ≥ 65 | [91]                  |
| <i>Citicoline</i>                    | ≥ 65 | [91]                  |
| <i>Cyclandelate</i>                  | ≥ 65 | [41, 46]              |
| <i>Dihydroergocristine</i>           | ≥ 65 | [46, 47, 77]          |
|                                      | ≥ 75 | [87]                  |
| <i>Dihydroergocryptine</i>           | ≥ 75 | [87]                  |
| <i>Dihydroergotoxine</i>             | ≥ 65 | [34, 41, 46, 47, 116] |
|                                      | ≥ 75 | [87]                  |
| <i>Ginkgo biloba</i>                 | ≥ 65 | [46-48, 77, 91]       |
|                                      | ≥ 75 | [87]                  |
| <i>Idebenone</i>                     | ≥ 65 | [91]                  |
| <i>Isoxsuprine</i>                   | ≥ 65 | [34, 41]              |
| <i>Moxisylyte</i>                    | ≥ 65 | [46]                  |
| <i>Nafidrofuryl</i>                  | ≥ 65 | [45-47]               |
|                                      | ≥ 75 | [87]                  |
| <i>Nicergoline,</i>                  | ≥ 65 | [45-47, 77]           |
|                                      | ≥ 75 | [87]                  |
| <i>Pentoxifylline</i>                | ≥ 65 | [45-47, 77]           |
|                                      | ≥ 75 | [87]                  |
| <i>Piracetam</i>                     | ≥ 65 | [45-47, 77, 91]       |
|                                      | ≥ 75 | [87]                  |
| <i>Piribedil</i>                     | ≥ 75 | [87]                  |
| <i>Vinburnine</i>                    | ≥ 65 | [46, 77]              |
|                                      | ≥ 75 | [87]                  |
| <i>Vincamine</i>                     | ≥ 65 | [46, 77]              |
|                                      | ≥ 75 | [87]                  |

**Table 5: PIM: Independent of Diagnoses or Conditions (ADHD medications)**

| Class/Medication       | Age  | References                    |
|------------------------|------|-------------------------------|
| <i>All ADHD Meds</i>   | < 6  | [103]                         |
| <i>Atomoxetine</i>     | 0-4  | [69]                          |
| <i>Clonidine</i>       | ≥ 65 | [31, 34, 46, 48, 66, 91, 116] |
|                        | ≥ 75 | [87]                          |
| <i>Guanfacine</i>      | ≥ 65 | [34, 46]                      |
|                        | ≥ 75 | [87]                          |
| <i>Methylphenidate</i> | ≥ 65 | [46, 91]                      |
| <i>Stimulants</i>      | 0-4  | [69]                          |

**Table 6: PIM: Independent of Diagnoses or Conditions (Mood stabilisers)**

| Class/Medication     | Age  | References   |
|----------------------|------|--------------|
| <i>Carbamazepine</i> | ≥ 65 | [34, 46, 91] |
| <i>Lithium</i>       | ≥ 65 | [46]         |

**Table 7: PIM: Independent of Diagnoses or Conditions (Anticholinergics)**

| Class/Medication                                   | Age  | References                     |
|----------------------------------------------------|------|--------------------------------|
| <i>Anticholinergics</i>                            | ≥ 65 | [38]                           |
|                                                    | ≥ 75 | [87]                           |
|                                                    | NH   | [92]                           |
| <i>High anticholinergic Meds</i>                   | ≥ 65 | [64, 107]                      |
| <i>Atropine (excludes ophthalmic) <sup>a</sup></i> | ≥ 65 | [34]                           |
| <i>Belladonna <sup>a</sup></i>                     | ≥ 65 | [34, 41, 46, 66, 91, 116, 118] |
|                                                    | ≥ 75 | [87]                           |
| <i>Benzatropine <sup>a</sup></i>                   | ≥ 65 | [34, 46, 84]                   |
| <i>Biperiden <sup>a</sup></i>                      | ≥ 65 | [46, 90, 91]                   |

|                                                |      |                           |
|------------------------------------------------|------|---------------------------|
|                                                | ≥ 75 | [85]                      |
| <i>Bornaprine</i> <sup>a</sup>                 | ≥ 65 | [84, 90]                  |
| <i>Clidinium-chlordiazepoxide</i> <sup>a</sup> | ≥ 65 | [34, 46]                  |
|                                                | ≥ 75 | [87]                      |
| <i>Dicyclomine (Dicyclomine)</i> <sup>a</sup>  | ≥ 65 | [34, 118]                 |
| <i>Dihexyverine</i> <sup>a</sup>               | ≥ 75 | [87]                      |
| <i>Diphenoxylate-atropine</i> <sup>a</sup>     | > 75 | [87]                      |
| <i>Homatropine methylbromide</i> <sup>a</sup>  | ≥ 65 | [91]                      |
| <i>Hyoscine</i> <sup>a</sup>                   | ≥ 65 | [34, 41, 46, 84, 91, 116] |
|                                                | ≥ 75 | [87]                      |
| <i>Hyoscyamine</i> <sup>a</sup>                | ≥ 65 | [34, 41, 46, 66, 118]     |
| <i>Orphenadrine</i> <sup>a</sup>               | ≥ 65 | [31, 34, 41, 46, 66, 116] |
| <i>Propantheline</i> <sup>a</sup>              | ≥ 65 | [34, 118]                 |
| <i>Tiemonium</i> <sup>a</sup>                  | ≥ 75 | [87]                      |
| <i>Trihexyphenidyl</i> <sup>a</sup>            | ≥ 65 | [34, 46, 84, 91]          |
|                                                | ≥ 75 | [85]                      |
| <i>Tropatepine</i> <sup>a</sup>                | ≥ 65 | [46]                      |

a. These medications were included because they can be used to treat some of the side effects caused by mental health medications.

### **PIM: considering diagnoses or conditions**

Prescribing [Class/Medication] to a patient with [Condition] +/- and aged [Age]

**Table 8: PIM: considering diagnoses or conditions (Antipsychotics)**

| CONDITION                                                         | CLASS/MEDICATION                                                     | AGE  | REFERENCE            |
|-------------------------------------------------------------------|----------------------------------------------------------------------|------|----------------------|
| <b>Dementia or Cognitive Impairment</b>                           | <i>Antipsychotics</i>                                                | ≥ 75 | [62, 85]             |
|                                                                   | <i>Antipsychotics</i>                                                | ≥ 65 | [34, 84]             |
|                                                                   | <i>Perphenazine</i>                                                  | ≥ 65 | [83]                 |
|                                                                   | <i>Clozapine</i>                                                     | ≥ 65 | [83]                 |
|                                                                   | <i>Haloperidol</i>                                                   | ≥ 65 | [83]                 |
|                                                                   | <i>Olanzapine</i>                                                    | ≥ 65 | [83]                 |
|                                                                   | <i>Antipsychotic other than risperidone and olanzapine</i>           | ≥ 75 | [87]                 |
| <b>Dementia but Not Psychosis</b>                                 | <i>Antipsychotics</i>                                                |      | [73]                 |
|                                                                   | <i>Risperidone</i>                                                   | ≥ 65 | [11]                 |
|                                                                   | <i>Olanzapine</i>                                                    |      | [11]                 |
| <b>Dementia and Psychosis</b>                                     | <i>Antipsychotic other than risperidone</i>                          | ≥ 65 | [73]                 |
| <b>BPSD</b>                                                       | <i>Antipsychotics</i>                                                | ≥ 65 | [25, 34]             |
|                                                                   | <i>Antipsychotics</i>                                                | ≥ 70 | [95]                 |
|                                                                   | <i>Antipsychotic other than risperidone</i>                          | -    | [15]                 |
| <b>Advanced dementia</b>                                          | <i>Antipsychotics</i>                                                | -    | [86]                 |
| <b>Advanced dementia (palliative)</b>                             | <i>Antipsychotics</i>                                                | -    | [80]                 |
| <b>Seizures or Epilepsy</b>                                       | <i>Antipsychotics</i>                                                | ≥ 65 | [116]                |
|                                                                   | <i>Chlorpromazine</i>                                                | ≥ 65 | [34]                 |
|                                                                   | <i>Phenothiazines</i>                                                | -    | [71]                 |
|                                                                   |                                                                      | ≥ 65 | [43, 47]             |
|                                                                   | <i>Haloperidol</i>                                                   | -    | [71]                 |
|                                                                   | <i>Clozapine</i>                                                     | ≥ 65 | [34]                 |
|                                                                   | <i>Thioridazine</i>                                                  | ≥ 65 | [34]                 |
|                                                                   | ≥ 65                                                                 | [34] |                      |
|                                                                   | <i>Thiothixene</i>                                                   | ≥ 65 | [34]                 |
|                                                                   | <i>Olanzapine</i>                                                    | ≥ 65 | [34]                 |
| <b>Parkinson's Disease</b>                                        | <i>Antipsychotics</i>                                                | ≥ 65 | [42]                 |
|                                                                   | <i>Antipsychotics other than quetiapine or clozapine</i>             | ≥ 65 | [25, 32, 48, 73, 92] |
|                                                                   | <i>Antipsychotics other than aripiprazole, quetiapine, clozapine</i> | ≥ 65 | [34, 84]             |
|                                                                   | <i>Prochlorperazine</i>                                              | -    | [15]                 |
|                                                                   |                                                                      | ≥ 65 | [25, 32, 34, 43]     |
|                                                                   | <i>Haloperidol</i>                                                   | ≥ 65 | [74, 83, 116]        |
|                                                                   | <i>Droperidol</i>                                                    | ≥ 65 | [74]                 |
|                                                                   | <i>Perphenazine</i>                                                  | ≥ 65 | [83]                 |
|                                                                   | <i>Clozapine</i>                                                     | ≥ 65 | [83]                 |
|                                                                   | <i>Olanzapine</i>                                                    | ≥ 65 | [83]                 |
| <b>History of prostatism or previous urinary retention or BPH</b> | <i>Antipsychotics</i>                                                | -    | [71]                 |
|                                                                   | <i>Chlorpromazine</i>                                                |      | [25]                 |
|                                                                   | <i>Clozapine</i>                                                     | ≥ 65 | [25]                 |
|                                                                   | <i>Flupenthixol</i>                                                  |      | [25]                 |
|                                                                   | <i>Fluphenazine</i>                                                  |      | [25]                 |

|                                                            |                                                          |          |              |
|------------------------------------------------------------|----------------------------------------------------------|----------|--------------|
|                                                            | <i>Pipothiazine</i>                                      |          | [25]         |
|                                                            | <i>Promazine</i>                                         |          | [25]         |
|                                                            | <i>Zuclopenthixol</i>                                    |          | [25]         |
| <b>Glaucoma</b>                                            | <i>Fluphenazine</i>                                      | -        | [71]         |
|                                                            | <i>Perphenazine</i>                                      | -        | [71]         |
|                                                            | <i>Trifluoperazine</i>                                   |          | [71]         |
| <b>Syncope</b>                                             | <i>Antipsychotics</i>                                    |          | [84]         |
|                                                            | <i>Chlorpromazine</i>                                    |          | [34]         |
|                                                            | <i>Thioridazine</i>                                      |          | [34]         |
|                                                            | <i>Olanzapine</i>                                        |          | [34, 83]     |
|                                                            | <i>Haloperidol</i>                                       |          | [83]         |
|                                                            | <i>Clozapine</i>                                         |          | [83]         |
| <b>Postural Hypotension</b>                                | <i>Perphenazine</i>                                      |          | [83]         |
|                                                            | <i>Antipsychotics</i>                                    |          | [84]         |
|                                                            | <i>Thioridazine</i>                                      | ≥ 65     | [88]         |
| <b>History of Falls</b>                                    | <i>Chlorpromazine</i>                                    |          | [93]         |
|                                                            | <i>Antipsychotics</i>                                    |          | [34, 47, 84] |
|                                                            | <i>Conventional antipsychotics</i>                       |          | [88]         |
|                                                            | <i>Perphenazine</i>                                      | ≥ 65     | [83]         |
|                                                            | <i>Clozapine</i>                                         | ≥ 65     | [83]         |
| <b>Delirium</b>                                            | <i>Haloperidol</i>                                       |          | [83]         |
|                                                            | <i>Olanzapine</i>                                        |          | [83]         |
|                                                            | <i>Clozapine</i>                                         | ≥ 65     | [83]         |
|                                                            | <i>Perphenazine</i>                                      | ≥ 65     | [83]         |
|                                                            | <i>Chlorpromazine</i>                                    |          | [34]         |
| <b>Depression</b>                                          | <i>Antipsychotics</i>                                    |          | [34, 84]     |
|                                                            | <i>Quetiapine</i>                                        | ≥ 65     | [101]        |
| <b>ADHD without Hyperactivity</b>                          | <i>Olanzapine</i>                                        | ≥ 65     | [101]        |
| <b>Arrhythmia</b>                                          | <i>Antipsychotics</i>                                    | Children | [103]        |
| <b>HTN</b>                                                 | <i>Antipsychotics</i>                                    | ≥ 65     | [116]        |
| <b>Swallowing Problems</b>                                 | <i>Clozapine</i>                                         | -        | [71]         |
| <b>Lewy Body Disease</b>                                   | <i>Antipsychotics</i>                                    | ≥ 65     | [42]         |
| <b>Insomnia / Sleep Disorders</b>                          | <i>Antipsychotics other than quetiapine or clozapine</i> | ≥ 65     | [25, 32]     |
|                                                            | <i>Pipamperone</i>                                       | ≥ 65     | [101]        |
| <b>DM</b>                                                  | <i>Melperone</i>                                         | ≥ 65     | [101]        |
| <b>Frail Adults with Limited Life Expectancy</b>           | <i>Antipsychotics</i>                                    | -        | [71]         |
| <b>Chronic constipation</b>                                | <i>Antipsychotics</i>                                    | -        | [78]         |
|                                                            | <i>Perphenazine</i>                                      |          | [83]         |
|                                                            | <i>Clozapine</i>                                         | ≥ 65     | [83]         |
|                                                            | <i>Haloperidol</i>                                       | ≥ 65     | [83]         |
| <b>QTC &gt; 450/470MS</b>                                  | <i>Olanzapine</i>                                        | ≥ 65     | [83]         |
| <b>Absolute neutrophil count &lt; 1.5*10<sup>9</sup>/L</b> | <i>Haloperidol</i>                                       | ≥ 65     | [104]        |
|                                                            | <i>Clozapine</i>                                         | ≥ 65     | [104]        |

ADHD: Attention deficit hyperactivity disorder. BPH: Benign prostatic hyperplasia. BPSD: Behavioural and Psychological Symptoms of Dementia. DM: Diabetes mellitus. HTN: Hypertension.

**Table 9: PIM: Considering Diagnoses or Conditions (Antidepressants)**

| CONDITION                                 | CLASS/MEDICATION                      | AGE  | REFERENCE     |
|-------------------------------------------|---------------------------------------|------|---------------|
| <b>Heart block</b>                        | <i>TCA</i>                            | ≥ 65 | [88, 93, 116] |
|                                           | <i>Amitriptyline at dose &gt;75mg</i> | -    | [10]          |
| <b>Cardiac conduction abnormalities</b>   | <i>TCA</i>                            |      | [25, 43, 68]  |
|                                           | <i>Amitriptyline</i>                  | ≥ 65 | [83]          |
|                                           | <i>Clomipramine</i>                   |      | [83]          |
|                                           | <i>Imipramine</i>                     |      | [83]          |
| <b>Cardiovascular risk factors or CVD</b> | <i>TCA</i>                            | ≥ 65 | [92]          |
| <b>Heart failure</b>                      | <i>Amitriptyline at dose &gt;75mg</i> | -    | [10]          |
|                                           | <i>TCA</i>                            | -    | [11, 71, 73]  |
|                                           | <i>TCA</i>                            | ≥ 65 | [47, 84]      |
| <b>Arrhythmia</b>                         | <i>TCA</i>                            | ≥ 65 | [84]          |
|                                           | <i>Amitriptyline at dose &gt;75mg</i> | -    | [10]          |
| <b>HTN</b>                                | <i>Venlafaxine</i>                    | -    | [71]          |
|                                           | <i>Duloxetine</i>                     | -    | [71]          |
|                                           | <i>MAOIs</i>                          | -    | [71]          |
| <b>Postural hypotension</b>               | <i>Amitriptyline at dose &gt;75mg</i> | -    | [10]          |
|                                           | <i>TCA</i>                            | ≥ 65 | [88, 92, 93]  |
| <b>Syncope</b>                            | <i>TCA</i>                            | ≥ 65 | [47, 116]     |

|                                                          |                                       |                      |                               |
|----------------------------------------------------------|---------------------------------------|----------------------|-------------------------------|
|                                                          | <i>Tertiary TCAs</i>                  |                      | [34]                          |
|                                                          | <i>Amitriptyline</i>                  |                      | [83]                          |
|                                                          | <i>Clomipramine</i>                   |                      | [83]                          |
|                                                          | <i>Imipramine</i>                     |                      | [83]                          |
| <b>History of falls</b>                                  | <i>SSRI</i>                           |                      | [34, 47, 88]                  |
|                                                          | <i>Amitriptyline</i>                  | ≥ 65                 | [83]                          |
|                                                          | <i>Clomipramine</i>                   |                      | [83]                          |
|                                                          | <i>Imipramine</i>                     |                      | [83]                          |
| <b>Seizures or epilepsy</b>                              | <i>SSRI</i>                           | -                    | [15, 71]                      |
|                                                          | <i>TCA</i>                            | -                    | [71]                          |
|                                                          | <i>Bupropion</i>                      | -                    | [10, 39, 71]                  |
|                                                          | <i>Bupropion</i>                      | ≥ 65                 | [34, 88]                      |
|                                                          | <i>Maprotiline</i>                    | ≥ 65                 | [34]                          |
| <b>Dementia or cognitive impairment</b>                  | <i>Antidepressants</i>                | ≥ 70                 | [95]                          |
|                                                          | <i>TCA</i>                            | ≥ 65                 | [25, 43, 47, 68, 73, 88, 116] |
|                                                          | <i>TCA</i>                            | -                    | [15]                          |
|                                                          | <i>Amitriptyline</i>                  | ≥ 65                 | [83]                          |
|                                                          | <i>Clomipramine</i>                   | ≥ 65                 | [83]                          |
|                                                          | <i>Imipramine</i>                     | ≥ 65                 | [83]                          |
| <b>Advanced dementia</b>                                 | <i>Selegiline</i>                     | ≥ 65                 | [101]                         |
|                                                          | <i>TCA</i>                            | -                    | [86]                          |
| <b>Advanced dementia (Palliative)</b>                    | <i>Antidepressants other than TCA</i> | -                    | [86]                          |
|                                                          | <i>TCA</i>                            | -                    | [80]                          |
| <b>BPSD: depression</b>                                  | <i>Antidepressants other than TCA</i> | -                    | [80]                          |
|                                                          | <i>Citalopram</i>                     |                      | [101]                         |
|                                                          | <i>Escitalopram</i>                   |                      | [101]                         |
|                                                          | <i>Sertraline</i>                     | ≥ 65                 | [101]                         |
|                                                          | <i>Fluoxetine</i>                     |                      | [101]                         |
|                                                          | <i>Venlafaxine</i>                    |                      | [101]                         |
| <b>Glaucoma</b>                                          | <i>Duloxetine</i>                     |                      | [101]                         |
|                                                          | <i>TCA</i>                            | ≥ 65                 | [25, 43, 47, 68, 92, 93, 116] |
|                                                          | <i>TCA</i>                            | -                    | [71]                          |
|                                                          | <i>Amitriptyline</i>                  | ≥ 65                 | [83]                          |
|                                                          | <i>Clomipramine</i>                   | ≥ 65                 | [83]                          |
|                                                          | <i>Imipramine</i>                     | ≥ 65                 | [83]                          |
|                                                          | <i>MAOI</i>                           | -                    | [71]                          |
|                                                          | <i>Citalopram</i>                     | -                    | [71]                          |
|                                                          | <i>Escitalopram</i>                   | -                    | [71]                          |
|                                                          | <i>Fluoxetine</i>                     | -                    | [71]                          |
|                                                          | <i>Fluvoxamine</i>                    | -                    | [71]                          |
|                                                          | <i>Mianserin</i>                      | -                    | [71]                          |
|                                                          | <i>Paroxetine</i>                     | -                    | [71]                          |
|                                                          | <b>Depression</b>                     | <i>Nortriptyline</i> |                               |
| <i>Mirtazapine</i>                                       |                                       |                      | [101]                         |
| <i>Venlafaxine</i>                                       |                                       |                      | [101]                         |
| <i>Duloxetine</i>                                        |                                       |                      | [101]                         |
| <i>Moclobemide</i>                                       |                                       |                      | [101]                         |
| <i>Bupropion</i>                                         |                                       | ≥ 65                 | [101]                         |
| <i>Vortioxetine</i>                                      |                                       |                      | [101]                         |
| <i>Agomelatine</i>                                       |                                       |                      | [101]                         |
| <i>Reboxetine</i>                                        |                                       |                      | [101]                         |
| <i>Trazodone</i>                                         |                                       |                      | [101]                         |
| <i>St. John's Wort</i>                                   |                                       |                      | [101]                         |
| <b>Insomnia / sleep disorders</b>                        | <i>Mirtazapine</i>                    |                      | [101]                         |
|                                                          | <i>Doxepin</i>                        | ≥ 65                 | [101]                         |
|                                                          | <i>Opipramol</i>                      |                      | [101]                         |
|                                                          | <i>Fluoxetine</i>                     |                      | [47]                          |
| <b>Prostatism or history of urinary retention or BPH</b> | <i>MAO</i>                            |                      | [47]                          |
|                                                          | <i>TCA</i>                            | -                    | [71]                          |
|                                                          | <i>TCA</i>                            |                      | [25, 43, 47, 68, 88, 92, 93]  |
|                                                          | <i>Amitriptyline</i>                  | ≥ 65                 | [83]                          |
|                                                          | <i>Clomipramine</i>                   |                      | [83]                          |
| <b>Urinary incontinence</b>                              | <i>Imipramine</i>                     |                      | [83]                          |
|                                                          | <i>TCA</i>                            | ≥ 65                 | [47, 116]                     |
| <b>Constipation</b>                                      | <i>TCA</i>                            |                      | [43, 47, 68, 88, 116]         |
|                                                          | <i>Amitriptyline</i>                  | ≥ 65                 | [83]                          |
|                                                          | <i>Clomipramine</i>                   |                      | [83]                          |
| <b>Current or recent significant hyponatraemia</b>       | <i>Imipramine</i>                     |                      | [83]                          |
|                                                          | <i>SSRI</i>                           | ≥ 65                 | [25, 43, 47, 92]              |
| <b>Renal failure</b>                                     | <i>SSRI</i>                           | -                    | [15]                          |
|                                                          | <i>Paroxetine</i>                     | -                    | [71]                          |

|                                                        |               |        |      |
|--------------------------------------------------------|---------------|--------|------|
| <b>Hepatic impairment or cirrhosis</b>                 | TCA           | -      | [71] |
| <b>Gastrointestinal haemorrhage</b>                    | Paroxetine    | ≥ 75   | [85] |
|                                                        | Sertraline    | ≥ 75   | [85] |
|                                                        | Fluvoxamine   | ≥ 75   | [85] |
|                                                        | Escitalopram  | ≥ 75   | [85] |
| <b>Peptic ulcer disease</b>                            | SSRI          | -      | [71] |
| <b>Bladder atony due to diabetes</b>                   | Imipramine    | ≥ 65   | [38] |
| <b>Anorexia and malnutrition</b>                       | Fluoxetine    | ≥ 65   | [47] |
| <b>Delirium</b>                                        | Amitriptyline |        | [83] |
|                                                        | Clomipramine  | ≥ 65   | [83] |
|                                                        | Imipramine    |        | [83] |
| <b>Acute bipolar depression</b>                        | TCA           | Adults | [49] |
| <b>Acute management of depressive bipolar disorder</b> | paroxetine    | Adults | [49] |

BPH: Benign prostatic hyperplasia. BPSD: Behavioural and Psychological Symptoms of Dementia. CVD: Cardiovascular disease. HTN: Hypertension. MAOi: Monoamine oxidase inhibitor. SSRI: Selective serotonin reuptake inhibitor. TCA: Tricyclic antidepressants.

**Table 10: PIM: Considering Diagnoses or Conditions (Sedative, hypnotics, and anxiolytics)**

| CONDITION                                   | CLASS/MEDICATION                     | AGE  | REFERENCE        |
|---------------------------------------------|--------------------------------------|------|------------------|
| <b>Dementia or cognitive impairment</b>     | Benzodiazepines                      | ≥ 75 | [87]             |
|                                             | Benzodiazepines                      |      | [34, 66, 84, 88] |
|                                             | Alprazolam                           |      | [83]             |
|                                             | Clorazepam                           |      | [83]             |
|                                             | Triazolam                            |      | [83]             |
|                                             | Chlorazepate                         |      | [83]             |
|                                             | Chlordiazepoxide                     | ≥ 65 | [83]             |
|                                             | Diazepam                             |      | [83]             |
|                                             | Flurazepam                           |      | [83]             |
|                                             | Eszopiclone                          |      | [34]             |
|                                             | Zolpidem                             |      | [34, 84]         |
|                                             | Zaleplon                             |      | [34]             |
|                                             | Barbiturates                         |      | [88]             |
| <b>History of falls or fractures</b>        | Sedative-hypnotics                   |      | [88]             |
|                                             | Benzodiazepines                      |      | [34, 47, 84, 88] |
|                                             | Alprazolam                           |      | [83]             |
|                                             | Clorazepam                           |      | [83]             |
|                                             | Triazolam                            |      | [83]             |
|                                             | Chlorazepate                         |      | [83]             |
|                                             | Chlordiazepoxide                     |      | [83]             |
|                                             | Diazepam                             | ≥ 65 | [83]             |
|                                             | Flurazepam                           |      | [83]             |
|                                             | Eszopiclone                          |      | [34]             |
|                                             | Zolpidem                             |      | [34, 84]         |
|                                             | Zaleplon                             |      | [34]             |
|                                             | Chlorpheniramine                     |      | [83]             |
| Clemastine                                  |                                      | [83] |                  |
| Doxylamine                                  |                                      | [83] |                  |
| Tripolidine                                 |                                      | [83] |                  |
| <b>Syncope</b>                              | Benzodiazepines                      | ≥ 65 | [84]             |
|                                             | Zolpidem                             |      | [84]             |
| <b>Postural hypotension</b>                 | Benzodiazepines                      | ≥ 65 | [84]             |
|                                             | Zolpidem                             |      | [84]             |
| <b>Acute or chronic respiratory failure</b> | Benzodiazepines                      | ≥ 65 | [25]             |
| <b>Asthma</b>                               | Benzodiazepines                      | ≥ 65 | [116]            |
|                                             | Propranolol                          | ≥ 65 | [85]             |
| <b>COPD</b>                                 | long-acting benzodiazepine           | ≥ 65 | [47]             |
|                                             | medium to long-acting benzodiazepine | ≥ 65 | [38]             |
|                                             | Benzodiazepines                      | ≥ 65 | [64, 66, 116]    |
|                                             | Benzodiazepines                      | -    | [15]             |
|                                             | Z-drugs                              | -    | [15]             |
|                                             | Propranolol                          | ≥ 65 | [85]             |
| <b>Sleep apnoea syndrome</b>                | Benzodiazepines                      | ≥ 65 | [66, 116]        |
|                                             | Benzodiazepines                      |      | [34, 84]         |
| <b>Delirium</b>                             | Sedative- hypnotics                  |      | [34]             |
|                                             | Alprazolam                           |      | [83]             |
|                                             | Clorazepam                           |      | [83]             |
|                                             | Triazolam                            | ≥ 65 | [83]             |
|                                             | Chlorazepate                         |      | [83]             |
|                                             | Chlordiazepoxide                     |      | [83]             |
|                                             | Diazepam                             |      | [83]             |
|                                             | Flurazepam                           |      | [83]             |



|                                        |                                             |      |           |
|----------------------------------------|---------------------------------------------|------|-----------|
|                                        | <i>Zolpidem</i>                             |      | [84]      |
| <b>Depression</b>                      | <i>long-acting benzodiazepine</i>           |      | [38, 101] |
|                                        | <i>Barbiturates</i>                         | ≥ 65 | [38]      |
|                                        | <i>Benzodiazepines</i>                      |      | [47, 101] |
|                                        | <i>Short acting benzodiazepine</i>          |      | [101]     |
| <b>Insomnia / sleep disorders</b>      | <i>Zopiclone</i>                            |      | [101]     |
|                                        | <i>Zolpidem</i>                             |      | [101]     |
|                                        | <i>Zaleplon</i>                             | ≥ 65 | [101]     |
|                                        | <i>Medium half-life Benzodiazepines</i>     |      | [101]     |
|                                        | <i>Very short half-life Benzodiazepines</i> |      | [101]     |
|                                        | <i>Diphenhydramine</i>                      |      | [101]     |
| <b>Urinary incontinence</b>            | <i>Benzodiazepines</i>                      | ≥ 65 | [66]      |
| <b>Urinary retention</b>               | <i>Benzodiazepines</i>                      | ≥ 65 | [66]      |
| <b>BPH</b>                             | <i>Antihistamine</i>                        | ≥ 65 | [116]     |
| <b>Advanced dementia</b>               | <i>Antihistamine 1st generation</i>         | -    | [86]      |
| <b>Parkinson disease</b>               | <i>Promethazine</i>                         | ≥ 65 | [34]      |
| <b>Hepatic impairment or cirrhosis</b> | <i>Benzodiazepines</i>                      | -    | [71]      |
|                                        | <i>Barbiturates</i>                         |      | [71]      |
| <b>Chronic constipation</b>            | <i>Chlorpheniramine</i>                     |      | [83]      |
|                                        | <i>Clemastine</i>                           |      | [83]      |
|                                        | <i>Doxylamine</i>                           | ≥ 65 | [83]      |
|                                        | <i>Tripolidine</i>                          |      | [83]      |
|                                        | <i>antihistamines</i>                       |      | [116]     |

BPH: Benign prostatic hyperplasia. COPD: Chronic Obstructive Pulmonary Disease

**Table 11: PIM: Considering Diagnoses or Conditions (Mood stabilisers)**

| CONDITION                   | CLASS/MEDICATION     | AGE  | REFERENCE |
|-----------------------------|----------------------|------|-----------|
| <b>Heart failure</b>        | <i>Carbamazepine</i> | -    | [71]      |
| <b>HTN</b>                  | <i>Carbamazepine</i> | -    | [71]      |
| <b>Bipolar disorder</b>     | <i>Carbamazepine</i> |      | [101]     |
|                             | <i>Valproic acid</i> | ≥ 65 | [101]     |
|                             | <i>Lamotrigine</i>   |      | [101]     |
|                             | <i>Lithium</i>       |      | [101]     |
| <b>Renal failure</b>        | <i>Lithium</i>       | -    | [71]      |
| <b>Rheumatoid arthritis</b> | <i>Lithium</i>       | -    | [71]      |
| <b>Thyroid disorders</b>    | <i>Lithium</i>       | -    | [71]      |
| <b>Epilepsy</b>             | <i>Lithium</i>       | -    | [71]      |

HTN: Hypertension.

**Table 12: PIM: Considering Diagnoses or Conditions (Anti-dementia)**

| CONDITION                                              | CLASS/MEDICATION                       | AGE  | REFERENCE |
|--------------------------------------------------------|----------------------------------------|------|-----------|
| <b>Persistent bradycardia</b>                          | <i>Acetylcholinesterase inhibitors</i> | ≥ 65 | [25, 42]  |
| <b>Heart block</b>                                     | <i>Acetylcholinesterase inhibitors</i> | ≥ 65 | [25]      |
| <b>Recurrent unexplained syncope</b>                   | <i>Acetylcholinesterase inhibitors</i> | ≥ 65 | [34]      |
| <b>Palliative care patients with advanced dementia</b> | <i>Acetylcholinesterase inhibitors</i> | -    | [80]      |
|                                                        | <i>Memantine</i>                       |      | [80]      |
| <b>Frail adults with limited life expectancy</b>       | <i>Memantine</i>                       | -    | [78]      |
|                                                        | <i>Memantine</i>                       |      | [101]     |
| <b>Dementia</b>                                        | <i>Ginkgo biloba</i>                   | ≥ 65 | [101]     |
|                                                        | <i>Ergoline derivatives</i>            |      | [101]     |
|                                                        | <i>Piracetam</i>                       |      | [101]     |
| <b>To treat dementia</b>                               | <i>Nylidrin</i>                        |      | [93]      |
|                                                        | <i>Niacin</i>                          | ≥ 65 | [93]      |
|                                                        | <i>Pentoxifylline</i>                  |      | [93]      |

**Table 13: PIM: Considering Diagnoses or Conditions (Anticholinergics)**

| CONDITION                               | CLASS/MEDICATION                                     | AGE  | REFERENCE                                        |
|-----------------------------------------|------------------------------------------------------|------|--------------------------------------------------|
| <b>Dementia or cognitive impairment</b> | <i>Anticholinergics</i>                              | -    | [39]                                             |
|                                         | <i>Anticholinergics</i>                              | ≥ 65 | [25, 32, 34, 42, 43, 47, 48, 64, 66, 68, 88, 93] |
|                                         | <i>Anticholinergics</i>                              | ≥ 75 | [87]                                             |
|                                         | <i>Trihexyphenidyl</i>                               | ≥ 75 | [87]                                             |
|                                         | <i>Tropatepine</i>                                   | ≥ 75 | [87]                                             |
|                                         | <i>Biperiden</i>                                     | ≥ 75 | [87]                                             |
| <b>Delirium</b>                         | <i>Anticholinergics</i>                              | ≥ 65 | [25, 32, 34, 42, 84]                             |
| <b>Chronic constipation</b>             | <i>Anticholinergics</i>                              | ≥ 65 | [25, 42, 48, 66, 84, 88]                         |
|                                         | <i>Anticholinergics</i>                              | ≥ 75 | [87]                                             |
|                                         | <i>Anticholinergics</i>                              | -    | [71]                                             |
| <b>Glaucoma</b>                         | <i>Anticholinergics</i>                              | ≥ 75 | [87]                                             |
|                                         | <i>Anticholinergics</i>                              |      | [25, 42, 47, 66, 84, 88]                         |
|                                         | <i>Medication with high anticholinergic activity</i> | ≥ 65 | [107]                                            |

|                                                                         |                                                                                        |      |                                  |
|-------------------------------------------------------------------------|----------------------------------------------------------------------------------------|------|----------------------------------|
|                                                                         | <i>2 or more agents with low to moderate anticholinergic activity</i>                  |      | [107]                            |
|                                                                         | <i>Orphenadrine<sup>a</sup></i>                                                        |      | [71]                             |
|                                                                         | <i>Hyoscine<sup>a</sup></i>                                                            |      | [71]                             |
| <b>History of urinary retention of BPH</b>                              | <i>Anticholinergics</i>                                                                | ≥ 65 | [25, 38, 42, 47, 48, 66, 84, 88] |
|                                                                         | <i>Anticholinergics</i>                                                                | ≥ 75 | [87]                             |
|                                                                         | <i>Anticholinergics</i>                                                                | -    | [50]                             |
|                                                                         | <i>Strongly anticholinergic drugs, except antimuscarinics for urinary incontinence</i> | ≥ 65 | [34]                             |
| <b>To treat extra-pyramidal side-effects of neuroleptic medications</b> | <i>Anticholinergics</i>                                                                | ≥ 65 | [25, 43, 47, 93]                 |
| <b>History of falls or fractures</b>                                    | <i>Anticholinergics</i>                                                                | ≥ 65 | [84]                             |
| <b>Syncope</b>                                                          | <i>Anticholinergics</i>                                                                | ≥ 65 | [84]                             |
| <b>Postural hypotension</b>                                             | <i>Anticholinergics</i>                                                                | ≥ 65 | [84]                             |

<sup>a</sup>. These medications were included because they can be used to treat some of the side effects caused by mental health medications.  
BPH: Benign prostatic hyperplasia

**Table 14: PIM: Considering Diagnoses or Conditions (ADHD medications)**

| CONDITION                                              | CLASS/MEDICATION       | AGE      | REFERENCE    |
|--------------------------------------------------------|------------------------|----------|--------------|
| <b>Anorexia</b>                                        | <i>Cyproheptadine</i>  | Children | [103]        |
|                                                        | <i>Clonidine</i>       |          | [103]        |
| <b>HTN</b>                                             | <i>Clonidine</i>       | -        | [71]         |
|                                                        | <i>Atomoxetine</i>     |          | [71]         |
| <b>Palliative care patients with advanced dementia</b> | <i>Clonidine</i>       | -        | [80]         |
| <b>Advanced dementia</b>                               | <i>Clonidine</i>       | -        | [86]         |
| <b>Anorexia and malnutrition to treat depression</b>   | <i>Methylphenidate</i> | ≥ 65     | [47]         |
|                                                        | <i>Methylphenidate</i> | ≥ 65     | [47, 93]     |
| <b>Epilepsy</b>                                        | <i>Methylphenidate</i> | -        | [71]         |
| <b>Chronic constipation</b>                            | <i>Clonidine</i>       | ≥ 75     | [87]         |
|                                                        | <i>Guanfacine</i>      |          | [87]         |
| <b>Insomnia</b>                                        | <i>Amphetamine</i>     | ≥ 65     | [34]         |
|                                                        | <i>Methylphenidate</i> |          | [34, 47, 84] |

HTN: Hypertension.

**Table 15: PIM: Considering Diagnoses or Conditions (non-mental health medications with mental health conditions)**

| CONDITION                      | CLASS/MEDICATION                                                                                | AGE  | REFERENCE    |
|--------------------------------|-------------------------------------------------------------------------------------------------|------|--------------|
| <b>Delirium</b>                | <i>Corticosteroids</i>                                                                          | ≥ 65 | [34]         |
|                                | <i>Cimetidine</i>                                                                               |      | [34]         |
|                                | <i>H2-receptor antagonists</i>                                                                  |      | [84]         |
|                                | <i>Famotidine</i>                                                                               |      | [34]         |
|                                | <i>Nizatidine</i>                                                                               |      | [34]         |
|                                | <i>Ranitidine</i>                                                                               |      | [34]         |
| <b>Insomnia</b>                | <i>Meperidine (Pethidine)</i>                                                                   | ≥ 65 | [34, 84]     |
|                                | <i>Pseudoephedrine</i>                                                                          |      | [34, 47, 84] |
|                                | <i>Phenylephrine</i>                                                                            |      | [34, 47, 84] |
|                                | <i>Armodafinil</i>                                                                              |      | [34]         |
|                                | <i>Modafinil</i>                                                                                |      | [34]         |
|                                | <i>Theophylline</i>                                                                             |      | [34, 84]     |
|                                | <i>Caffeine</i>                                                                                 |      | [34, 84]     |
| <b>Depression</b>              | <i>Phenylpropanolamine</i>                                                                      | ≥ 65 | [47]         |
|                                | <i>PPI</i>                                                                                      |      | [47]         |
|                                | <i>Methyl dopa</i>                                                                              |      | [116]        |
| <b>Dementia</b>                | <i>Sympatholytic antihypertensive</i>                                                           | ≥ 65 | [38]         |
|                                | <i>Moderate to high lipophilic beta-adrenergic blocking agent (e.g., propranolol, pindolol)</i> |      | [38]         |
|                                | <i>Statins</i>                                                                                  |      | [101]        |
|                                | <i>Nimodipine</i>                                                                               |      | [101]        |
|                                | <i>Pyritinol</i>                                                                                |      | [101]        |
|                                | <i>Antioxidants: vitamin e</i>                                                                  |      | [101]        |
|                                | <i>Antioxidants: vitamin c</i>                                                                  |      | [101]        |
|                                | <i>Antioxidants: selenium</i>                                                                   |      | [101]        |
|                                | <i>Phytotherapeutic agents, e.g. Ginseng</i>                                                    |      | [101]        |
|                                | <i>Hormone preparations, e.g. DHEA (Dehydroepiandrosterone), testosterone</i>                   |      | [101]        |
|                                | <i>Antiphlogistics, e.g. Indomethacin</i>                                                       |      | [101]        |
|                                | <i>Desferrioxamine</i>                                                                          |      | [101]        |
| <i>H2-receptor antagonists</i> | [34, 84, 116]                                                                                   |      |              |
| <i>Antispasmodic</i>           | [47, 93, 116]                                                                                   |      |              |

|                                         |                                                                                   |                         |      |
|-----------------------------------------|-----------------------------------------------------------------------------------|-------------------------|------|
| <b>Advanced dementia</b>                | <i>Meperidine</i>                                                                 | [84]                    |      |
|                                         | <i>Colchicine</i>                                                                 | [86]                    |      |
|                                         | <i>Digoxin</i>                                                                    | [86]                    |      |
|                                         | <i>Antiarrhythmics class I and III</i>                                            | [86]                    |      |
|                                         | <i>Hydralazine</i>                                                                | [86]                    |      |
|                                         | <i>Bisphosphonates</i>                                                            | [86]                    |      |
|                                         | <i>Antiplatelets excluding aspirin</i>                                            | [86]                    |      |
|                                         | <i>VKA</i>                                                                        | [86]                    |      |
|                                         | <i>Anticoagulants excluding VKA</i>                                               | [86]                    |      |
|                                         | <i>Appetite stimulants</i>                                                        | [86]                    |      |
|                                         | <i>Bladder relaxants</i>                                                          | [86]                    |      |
|                                         | <i>Antispasmodics</i>                                                             | [86]                    |      |
|                                         | <i>Lipid-lowering medications</i>                                                 | [86]                    |      |
|                                         | <i>Leukotriene receptor antagonists</i>                                           | [86]                    |      |
|                                         | <i>Antioestrogens</i>                                                             | [86]                    |      |
|                                         | <i>Sex hormones</i>                                                               | [86]                    |      |
|                                         | <i>Cytotoxic chemotherapy</i>                                                     | [86]                    |      |
|                                         | <i>Hormone antagonists</i>                                                        | [86]                    |      |
|                                         | <i>Immunomodulators</i>                                                           | [86]                    |      |
|                                         | <i>NSAIDs</i>                                                                     | [86]                    |      |
|                                         | <i>Antidiarrheals</i>                                                             | [86]                    |      |
|                                         | <i>Laxatives</i>                                                                  | [86]                    |      |
|                                         | <i>Antiemetics</i>                                                                | [86]                    |      |
|                                         | <i>Proton pump inhibitors</i>                                                     | [86]                    |      |
|                                         | <i>Beta-blockers</i>                                                              | [86]                    |      |
|                                         | <i>Calcium channel blockers</i>                                                   | [86]                    |      |
|                                         | <i>Diuretics</i>                                                                  | [86]                    |      |
|                                         | <i>Angiotensin-converting enzyme inhibitors and angiotensin receptor blockers</i> | [86]                    |      |
|                                         | <i>Nitrates/nitroglycerin</i>                                                     | [86]                    |      |
|                                         | <i>Antibacterials</i>                                                             | [86]                    |      |
|                                         | <i>Antivirals</i>                                                                 | [86]                    |      |
|                                         | <i>Antiparasitic agents</i>                                                       | [86]                    |      |
|                                         | <i>Oral hypoglycaemics</i>                                                        | [86]                    |      |
|                                         | <i>Thyroid hormones</i>                                                           | [86]                    |      |
|                                         | <i>Antithyroid medications</i>                                                    | [86]                    |      |
|                                         | <i>Corticosteroids</i>                                                            | [86]                    |      |
|                                         | <i>Insulin</i>                                                                    | [86]                    |      |
|                                         | <i>Antihistamine second generation</i>                                            | [86]                    |      |
|                                         | <i>Electrolytes</i>                                                               | [86]                    |      |
|                                         | <i>Antiglaucoma drops</i>                                                         | [86]                    |      |
|                                         | <i>Anti-inflammatory eye drops</i>                                                | [86]                    |      |
|                                         | <i>Allopurinol</i>                                                                | [86]                    |      |
|                                         | <i>Uroselective alpha blockers</i>                                                | [86]                    |      |
|                                         | <i>Aspirin</i>                                                                    | [86]                    |      |
|                                         | <b>Advanced dementia (palliative)</b>                                             | <i>Bisphosphonates</i>  | [80] |
|                                         |                                                                                   | <i>Hydralazine</i>      | [80] |
|                                         |                                                                                   | <i>Antiarrhythmics</i>  | [80] |
|                                         |                                                                                   | <i>Heparin and LMWH</i> | [80] |
|                                         |                                                                                   | <i>Antispasmodics</i>   | [80] |
|                                         |                                                                                   | <i>Warfarin</i>         | [80] |
| <i>Hormone antagonists</i>              |                                                                                   | [80]                    |      |
| <i>Immunomodulators</i>                 |                                                                                   | [80]                    |      |
| <i>Sex hormones</i>                     |                                                                                   | [80]                    |      |
| <i>Antioestrogens</i>                   |                                                                                   | [80]                    |      |
| <i>Lipid-lowering medications</i>       |                                                                                   | [80]                    |      |
| <i>Antiplatelets excluding aspirin</i>  |                                                                                   | [80]                    |      |
| <i>Leukotriene receptor antagonists</i> |                                                                                   | [80]                    |      |
| <i>Cytotoxic chemotherapy</i>           |                                                                                   | [80]                    |      |
| <i>Mineralocorticoids</i>               |                                                                                   | [80]                    |      |
| <i>Tamsulosin</i>                       |                                                                                   | [80]                    |      |
| <i>Digoxin</i>                          |                                                                                   | [80]                    |      |
| <i>Bladder relaxants</i>                |                                                                                   | [80]                    |      |
| <i>Alpha blockers</i>                   |                                                                                   | [80]                    |      |
| <i>Antiandrogens</i>                    |                                                                                   | [80]                    |      |
| <i>Appetite stimulants</i>              |                                                                                   | [80]                    |      |
| <i>Proton pump inhibitors</i>           |                                                                                   | [80]                    |      |
| <i>Histamine-2 receptor blockers</i>    |                                                                                   | [80]                    |      |
| <i>Beta-blockers</i>                    |                                                                                   | [80]                    |      |
| <i>Calcium channel blockers</i>         |                                                                                   | [80]                    |      |
| <i>Diuretics</i>                        | [80]                                                                              |                         |      |

|                                  |                                    |      |      |
|----------------------------------|------------------------------------|------|------|
|                                  | <i>ACEi and ARB</i>                |      | [80] |
|                                  | <i>Nitroglycerin</i>               |      | [80] |
|                                  | <i>Mucolytics</i>                  |      | [80] |
|                                  | <i>Inhaled corticosteroids</i>     |      | [80] |
|                                  | <i>Antibacterials</i>              |      | [80] |
|                                  | <i>Antivirals</i>                  |      | [80] |
|                                  | <i>Antiparasitic agents</i>        |      | [80] |
|                                  | <i>Antifungal creams</i>           |      | [80] |
|                                  | <i>Oral hypoglycaemics</i>         |      | [80] |
|                                  | <i>Thyroid hormones</i>            |      | [80] |
|                                  | <i>Antithyroid medications</i>     |      | [80] |
|                                  | <i>Corticosteroids</i>             |      | [80] |
|                                  | <i>Insulin</i>                     |      | [80] |
|                                  | <i>Antihistamines</i>              |      | [80] |
|                                  | <i>Decongestants</i>               |      | [80] |
|                                  | <i>Electrolytes</i>                |      | [80] |
|                                  | <i>Nutritional supplements</i>     |      | [80] |
|                                  | <i>Antiglaucoma drops</i>          |      | [80] |
|                                  | <i>Anti-inflammatory eye drops</i> |      | [80] |
|                                  | <i>Capsaicin</i>                   |      | [80] |
|                                  | <i>Allopurinol</i>                 |      | [80] |
|                                  | <i>Colchicine</i>                  |      | [80] |
|                                  | <i>Fentanyl</i>                    | ≥ 65 | [47] |
| <b>Dementia (non-palliative)</b> | <i>Morphine</i>                    |      | [47] |

ACEi: Angiotensin-converting-enzyme inhibitor. ARB: Angiotensin II receptor blockers. LMWH: Low-molecular-weight heparin. NSAID: Nonsteroidal anti-inflammatory drugs. PPI: Proton pump inhibitors. VKA: Vitamin K antagonists.

**Table 16: PIM: Considering Diagnoses or Conditions (Non-specific psychotropics)**

| CONDITION        | CLASS/MEDICATION     | AGE  | REFERENCE |
|------------------|----------------------|------|-----------|
| History of falls | <i>psychotropics</i> | ≥ 65 | [64]      |

### Drug-Drug Interactions

Prescribing [Class/Medication] with [Class/Medication] +/- to a patient aged [Age]

**Table 17: Drug-Drug Interactions (Non-specific psychotropics)**

| Medication/Class                                           | Medication/Class               | Age  | References |
|------------------------------------------------------------|--------------------------------|------|------------|
| <i>More than one psychotropic drug from the same class</i> |                                | ≥ 75 | [87]       |
| <i>3 or more psychotropics</i>                             |                                | ≥ 70 | [95, 96]   |
| <i>Multiple psychotropics</i>                              |                                | ≥ 65 | [107, 108] |
| <i>≥2 CNS-active drugs</i>                                 | <i>Opioid receptor agonist</i> | ≥ 65 | [34]       |
| <i>Tranquilizer</i>                                        | <i>Tranquilizer</i>            | ≥ 65 | [112]      |

CNS: Central nervous system

**Table 18: Drug-Drug Interactions (Antipsychotics)**

| Medication/Class                    | Medication/Class               | Age    | References |
|-------------------------------------|--------------------------------|--------|------------|
| <i>3 or more antipsychotics</i>     |                                | adults | [69]       |
|                                     | <i>≥2 CNS-active drugs</i>     | ≥ 65   | [34]       |
| <i>Antipsychotics</i>               | <i>Antipsychotic</i>           | ≥ 65   | [32, 41]   |
|                                     |                                | -      | [22, 71]   |
|                                     | <i>Antiparkinsonian agents</i> | ≥ 65   | [44]       |
| <i>Atypical antipsychotic</i>       | <i>Atypical antipsychotic</i>  | -      | [22]       |
| <i>Pimozide</i>                     | <i>Macrolides antibiotics</i>  | -      | [89]       |
|                                     | <i>Azole antifungal</i>        | -      | [89]       |
| <i>Phenothiazine antipsychotics</i> | <i>Antiparkinsonian agents</i> | ≥ 65   | [108]      |
| <i>Aripiprazole</i>                 |                                |        | [71]       |
| <i>Quetiapine</i>                   | <i>Anti-HCV antivirals</i>     | -      | [71]       |
| <i>Iloperidone</i>                  |                                |        | [71]       |
| <i>Quetiapine</i>                   | <i>CYP inhibitor</i>           | -      | [104]      |

CNS: Central nervous system. HCV: Hepatitis C virus

**Table 19: Drug-Drug Interactions (Antidepressants)**

| Medication/Class                                                | Medication/Class                                                | Age  | References |
|-----------------------------------------------------------------|-----------------------------------------------------------------|------|------------|
| <i>Antidepressants</i>                                          | <i>Antidepressants</i>                                          |      | [32]       |
|                                                                 | <i>≥2 other CNS-active drugs</i>                                | ≥ 65 | [34]       |
| <i>Any serotonergic drug (SSRI, SNRI, MAO-I, TCA, triptans)</i> | <i>Any serotonergic drug (SSRI, SNRI, MAO-I, TCA, triptans)</i> | -    | [104]      |

|                       |                                                       |          |              |
|-----------------------|-------------------------------------------------------|----------|--------------|
|                       | MAO                                                   | -        | [15]         |
|                       | Opiate                                                | ≥ 65     | [43, 47, 68] |
|                       | Calcium channel blocker                               | ≥ 65     | [43, 47, 68] |
|                       | TCA                                                   | ≥ 65     | [41, 112]    |
| TCA                   | Clonidine                                             | ≥ 65     | [41]         |
|                       |                                                       | -        | [111]        |
|                       | Cimetidine                                            | ≥ 65     | [116]        |
|                       |                                                       | -        | [111]        |
|                       | Fluoxetine                                            | -        | [111]        |
|                       | Fluvoxamine                                           | ≥ 70     | [96]         |
|                       | Paroxetine                                            | ≥ 70     | [96]         |
|                       | Selegiline                                            | -        | [102]        |
| SSRI                  | Tramadol                                              | ≥ 70     | [95]         |
|                       |                                                       | -        | [15]         |
|                       | Aspirin (no protection)                               | ≥ 65     | [92]         |
|                       |                                                       | -        | [15]         |
|                       | medications that may contribute to serotonin toxicity | ≥ 65     | [64]         |
|                       | MAOI                                                  | ≥ 65     | [93]         |
|                       |                                                       | -        | [89]         |
|                       | SSRI's                                                | ≥ 65     | [25, 43, 68] |
|                       | NSAID                                                 | ≥ 65     | [48, 68]     |
|                       | NSAID (no protection)                                 | ≥ 45     | [70]         |
|                       | Venlafaxine.                                          | ≥ 45     | [70]         |
| Vitamin K antagonists | -                                                     | [71]     |              |
| Selegiline            | -                                                     | [111]    |              |
| SSRIs/SNRIs           | NSAIDs                                                | ≥ 70     | [95, 96]     |
|                       | Warfarin                                              | ≥ 70     | [95, 96]     |
| MAOI                  | Tramadol                                              | -        | [15]         |
|                       | Dextromethorphan                                      | -        | [89]         |
|                       | Anorexians                                            | -        | [89]         |
|                       | Amphetamine and derivatives                           | -        | [102]        |
|                       | Fluoxetine                                            | -        | [102]        |
|                       | Narcotic analgesics                                   | -        | [102]        |
|                       | Triptans                                              | -        | [102]        |
|                       | Sympathomimetics                                      | -        | [89]         |
|                       | Meperidine                                            | -        | [89]         |
|                       | Bupropion                                             | -        | [104]        |
|                       | Levodopa                                              | -        | [104]        |
|                       | Levodopa                                              | ≥ 65     | [41, 112]    |
|                       | Meperidine                                            | ≥ 65     | [41, 112]    |
|                       | Antidepressants                                       | ≥ 65     | [41, 112]    |
|                       | MAOI                                                  | ≥ 65     | [41, 112]    |
| Amitriptyline         | Sertraline                                            | children | [79]         |
|                       | Trazodone                                             | children | [79]         |
|                       | Psycholeptic                                          | ≥ 65     | [41]         |
|                       | opiate                                                | ≥ 65     | [83]         |
|                       | Calcium channel blocker                               | ≥ 65     | [83]         |
| Citalopram            | QT-prolonging drugs                                   | -        | [15]         |
| Citalopram            |                                                       |          |              |
| Sertraline            | Linezolid                                             | children | [79]         |
| Fluoxetine            | Alprazolam                                            | -        | [111]        |
| Fluvoxamine           | Theophyllines                                         | -        | [89]         |
|                       | Ramelteon                                             | -        | [102]        |
| Paroxetine            |                                                       |          | [95]         |
| Fluoxetine            | Metoprolol                                            | ≥ 70     | [95]         |
| Bupropion             |                                                       |          | [95]         |
| Trazodone             |                                                       |          | [71]         |
| Escitalopram          | anti-HCV antivirals                                   | -        | [71]         |
| Tranylcypromine       | Procarbazine                                          | -        | [102]        |
| Clomipramine          | Opiate                                                | ≥ 65     | [83]         |
|                       | Calcium channel blocker                               | ≥ 65     | [83]         |
| Imipramine            | Opiate                                                | ≥ 65     | [83]         |
|                       | Calcium channel blocker                               | ≥ 65     | [83]         |

CNS: Central nervous system. MAOI: Monoamine oxidase inhibitor. NSAID: Nonsteroidal anti-inflammatory drugs. SNRI: Serotonin and norepinephrine reuptake inhibitors. SSRI: Selective serotonin reuptake inhibitor. TCA: Tricyclic antidepressants.

**Table 20: Drug-Drug Interactions (Sedative, hypnotics and anxiolytics)**

| Medication/Class            | Medication/Class                                   | Age      | References    |                         |
|-----------------------------|----------------------------------------------------|----------|---------------|-------------------------|
| <i>Hypnotic or sedative</i> | <i>Hypnotic or sedative</i>                        | ≥ 65     | [32, 41, 112] |                         |
| <i>Benzodiazepine</i>       | <i>Hypnotic or sedative</i>                        | ≥ 65     | [41, 112]     |                         |
|                             | ≥2 CNS-active drugs                                | ≥ 65     | [34]          |                         |
|                             | <i>Azole antifungal agents</i>                     | -        | [89]          |                         |
|                             | <i>Cimetidine</i>                                  | ≥ 65     | [116]         |                         |
|                             | <i>Benzodiazepines</i>                             |          | ≥ 45          | [70]                    |
|                             |                                                    |          | ≥ 65          | [41, 74, 108, 112, 114] |
| <i>Alprazolam</i>           |                                                    | -        | [71]          |                         |
| <i>Midazolam</i>            | <i>Strong CYP3A4 inhibitor</i>                     | ≥ 65     | [48]          |                         |
| <i>Triazolam</i>            |                                                    |          | [48]          |                         |
| <i>Midazolam</i>            | <i>Protease inhibitors</i>                         | -        | [104]         |                         |
| <i>Triazolam</i>            | <i>Protease inhibitors</i>                         | -        | [104]         |                         |
| <i>Clonazepam</i>           | <i>Clonazepam</i>                                  | ≥ 65     | [112]         |                         |
|                             | <i>Benzodiazepines</i>                             | ≥ 65     | [41, 112]     |                         |
| <i>Clorazepate</i>          | <i>Acepromazine</i>                                | ≥ 65     | [46]          |                         |
| <i>Flurazepam</i>           |                                                    |          | [71]          |                         |
| <i>Guazepam</i>             | <i>Anti-HCV antivirals</i>                         | -        | [71]          |                         |
| <i>Triazolam</i>            |                                                    | -        | [71]          |                         |
| <i>Alprazolam</i>           |                                                    | -        | [71]          |                         |
| <i>Z-drugs</i>              | ≥2 CNS-active drugs                                | ≥ 65     | [34]          |                         |
| <i>Zolpidem</i>             | <i>Strong CYP3A4 inhibitor</i>                     | ≥ 65     | [48]          |                         |
| <i>Zopiclone</i>            |                                                    |          | [48]          |                         |
| <i>Zolpidem</i>             | <i>Anti-HCV antivirals</i>                         | -        | [71]          |                         |
|                             | <i>Hypnotic or sedative</i>                        | ≥ 65     | [41, 112]     |                         |
| <i>Barbiturates</i>         | <i>Hormonal contraceptive or combination pills</i> | -        | [111]         |                         |
|                             | <i>Steroids</i>                                    | -        | [111]         |                         |
|                             | <i>Barbiturates</i>                                | ≥ 65     | [41, 112]     |                         |
|                             | <i>Warfarin</i>                                    | -        | [89, 111]     |                         |
|                             | <i>Opioids</i>                                     | ≥ 65     | [41, 112]     |                         |
|                             | <i>Antidepressants</i>                             | ≥ 65     | [41, 112]     |                         |
| <i>Phenobarbital</i>        | <i>Rivaroxaban</i>                                 | -        | [71]          |                         |
|                             | <i>Voriconazole</i>                                | children | [79]          |                         |
| <i>Propranolol</i>          | <i>Insulin</i>                                     |          | [111]         |                         |
|                             | <i>Rifampin</i>                                    | -        | [111]         |                         |
|                             | <i>Verapamil</i>                                   |          | [111]         |                         |

CNS: Central nervous system. CYP: Cytochrome P450. HCV: Hepatitis C virus.

**Table 21: Drug-Drug Interactions (mood stabilisers)**

| Medication/Class     | Medication/Class                                   | Age                                                                           | References        |           |
|----------------------|----------------------------------------------------|-------------------------------------------------------------------------------|-------------------|-----------|
| <i>Valproic acid</i> | <i>Lamotrigine</i>                                 | Children                                                                      | [79]              |           |
|                      | <i>Meropenem</i>                                   | Children                                                                      | [79]              |           |
|                      | <i>Barbiturates</i>                                | -                                                                             | [111]             |           |
|                      | <i>Carbapenem</i>                                  | -                                                                             | [104]             |           |
| <i>Carbamazepine</i> |                                                    | -                                                                             | [109]             |           |
|                      | <i>Clarithromycin</i>                              | ≥ 45                                                                          | [70]              |           |
|                      |                                                    | ≥ 70                                                                          | [96]              |           |
|                      |                                                    | ≥ 45                                                                          | [70]              |           |
|                      | <i>Erythromycin</i>                                | ≥ 70                                                                          | [96]              |           |
|                      |                                                    | ≥ 65                                                                          | [116]             |           |
|                      |                                                    | <i>oral or intravaginal contraceptives, patches or pure progestogen pills</i> | -                 | [71]      |
|                      |                                                    | <i>Warfarin</i>                                                               | -                 | [111]     |
|                      |                                                    | <i>Propoxyphene</i>                                                           | -                 | [89, 111] |
|                      |                                                    | <i>Rivaroxaban</i>                                                            | -                 | [71]      |
| <i>Lithium</i>       | <i>ACEi</i>                                        | ≥ 65                                                                          | [34]              |           |
|                      | <i>Loop diuretics</i>                              | ≥ 65                                                                          | [34]              |           |
|                      | <i>thiazide diuretic</i>                           | -                                                                             | [10, 39, 41, 111] |           |
|                      | <i>RAAS inhibitors</i>                             | ≥ 65                                                                          | [48]              |           |
|                      | <i>NSAID</i>                                       | ≥ 65                                                                          | [48]              |           |
|                      | <i>Diuretics</i>                                   | ≥ 65                                                                          | [48]              |           |
|                      | -                                                  | [49]                                                                          |                   |           |
| <i>Lamotrigine</i>   | <i>Hormonal contraceptive or combination pills</i> | -                                                                             | [71]              |           |

ACEi: Angiotensin-converting-enzyme inhibitor. NSAID: Nonsteroidal anti-inflammatory drugs. RAAS: Renin-angiotensin system.

**Table 22: Drug-Drug Interactions (Anti-dementia)**

| Medication/Class | Medication/Class | Age | References |
|------------------|------------------|-----|------------|
|------------------|------------------|-----|------------|

|                                 |                                 |      |                      |
|---------------------------------|---------------------------------|------|----------------------|
| <i>Anticholinesterase drugs</i> | <i>Anticholinergic</i>          | ≥ 75 | <a href="#">[87]</a> |
|                                 | <i>Anticholinergic</i>          | ≥ 65 | <a href="#">[77]</a> |
|                                 | <i>Anticholinesterase drugs</i> | -    | <a href="#">[71]</a> |
|                                 | <i>Beta-blockers</i>            | ≥ 65 | <a href="#">[25]</a> |
|                                 | <i>Digoxin</i>                  | ≥ 65 | <a href="#">[25]</a> |
|                                 | <i>Diltiazem</i>                | ≥ 65 | <a href="#">[25]</a> |
|                                 | <i>Verapamil</i>                | ≥ 65 | <a href="#">[25]</a> |

**Table 23: Drug-Drug Interactions (Anticholinergics)**

| Medication/Class                                                        | Medication/Class       | Age  | References                       |
|-------------------------------------------------------------------------|------------------------|------|----------------------------------|
| <i>Two or more agents with low to moderate anticholinergic activity</i> |                        | ≥ 65 | <a href="#">[107]</a>            |
| <i>Anticholinergic</i>                                                  | <i>Anticholinergic</i> | ≥ 65 | <a href="#">[25, 32, 34, 48]</a> |

**Table 24: Drug-Drug Interactions (ADHD medications)**

| Medication/Class | Medication/Class   | Age | References            |
|------------------|--------------------|-----|-----------------------|
| <i>Clonidine</i> | <i>Propranolol</i> | -   | <a href="#">[111]</a> |

### Inappropriate Duration

Prescribing [Class/Medication] for [Duration] +/- to a patient with [Condition] +/- and aged [Age]

**Table 25: Inappropriate Duration (Antipsychotics)**

| Class/Medication                    | Condition                  | Duration   | Age    | References                   |
|-------------------------------------|----------------------------|------------|--------|------------------------------|
| <i>Antipsychotics</i>               | Dementia but not psychosis | >6 weeks   | ≥ 65   | <a href="#">[10]</a>         |
|                                     | Parkinsonism               | >1 month   | -      | <a href="#">[15]</a>         |
|                                     | as long-term hypnotics     | >1 month   | ≥ 65   | <a href="#">[43, 47, 77]</a> |
|                                     | non-psychotic indications  | long term  | ≥ 65   | <a href="#">[108]</a>        |
|                                     | -                          | >1 month   | ≥ 65   | <a href="#">[48]</a>         |
| <i>More than one Antipsychotics</i> | -                          | long term  | ≥ 65   | <a href="#">[42]</a>         |
|                                     | -                          | >2 month   | Adults | <a href="#">[69]</a>         |
| <i>Risperidone</i>                  | -                          | 45 days    | 6–17   | <a href="#">[69]</a>         |
|                                     | -                          | >6 weeks   | ≥ 65   | <a href="#">[46]</a>         |
| <i>Perphenazine</i>                 | dementia and psychosis     | ≥ 12 weeks | ≥ 65   | <a href="#">[73]</a>         |
|                                     | Parkinsonism               | >1 month   | ≥ 65   | <a href="#">[83]</a>         |
| <i>Clozapine</i>                    | as long-term hypnotics     | >1 month   | ≥ 65   | <a href="#">[83]</a>         |
|                                     | Parkinsonism               | >1 month   | ≥ 65   | <a href="#">[83]</a>         |
| <i>Haloperidol</i>                  | as long-term hypnotics     | >1 month   | ≥ 65   | <a href="#">[83]</a>         |
|                                     | Parkinsonism               | >1 month   | ≥ 65   | <a href="#">[83]</a>         |
| <i>Olanzapine</i>                   | as long-term hypnotics     | >1 month   | ≥ 65   | <a href="#">[83]</a>         |
|                                     | as long-term hypnotics     | >1 month   | ≥ 65   | <a href="#">[83]</a>         |

**Table 26: Inappropriate Duration (Antidepressants)**

| Class/Medication                     | Condition                    | Duration              | Age    | References           |
|--------------------------------------|------------------------------|-----------------------|--------|----------------------|
| <i>Antidepressants</i>               | -                            | long term             | ≥ 65   | <a href="#">[42]</a> |
|                                      | -                            | ≥ 1 year              | ≥ 65   | <a href="#">[48]</a> |
| <i>Three or more Antidepressants</i> | -                            | >3 month              | adults | <a href="#">[69]</a> |
| <i>TCA</i>                           | -                            | >1 month              | ≥ 65   | <a href="#">[73]</a> |
| <i>More than one TCA</i>             | -                            | >1 month              | adults | <a href="#">[69]</a> |
| <i>SSRI</i>                          | -                            | < 4 weeks (too short) | ≥ 65   | <a href="#">[92]</a> |
|                                      | single episode of depression | > 6 months            | ≥ 65   | <a href="#">[92]</a> |
| <i>More than one SSRI</i>            | -                            | >2 month              | adults | <a href="#">[69]</a> |
| <i>SSRI and SNRI combination</i>     | -                            | >2 month              | adults | <a href="#">[69]</a> |

SNRI: Serotonin and norepinephrine reuptake inhibitors. SSRI: Selective serotonin reuptake inhibitor. TCA: Tricyclic antidepressants.

**Table 27: Inappropriate Duration (Sedative, hypnotics and anxiolytics)**

| Class/Medication      | Condition                          | Duration  | Age  | References                        |
|-----------------------|------------------------------------|-----------|------|-----------------------------------|
| <i>Hypnotics</i>      | -                                  | -         | -    | <a href="#">[71]</a>              |
|                       | -                                  | long term | ≥ 65 | <a href="#">[92]</a>              |
|                       | -                                  | >1 month  | ≥ 70 | <a href="#">[95]</a>              |
|                       | -                                  | >1 month  | -    | <a href="#">[115]</a>             |
| <i>Benzodiazepine</i> | not receiving on a long-term basis | ≥21 days  | ≥ 65 | <a href="#">[10]</a>              |
|                       | Depression                         | ≥21 days  | ≥ 65 | <a href="#">[10]</a>              |
|                       | -                                  | >1 month  | -    | <a href="#">[15]</a>              |
|                       | -                                  | >1 month  | ≥ 65 | <a href="#">[25, 32, 64, 112]</a> |
|                       | -                                  | >1 month  | -    | <a href="#">[15, 99]</a>          |
|                       |                                    |           | ≥ 45 | <a href="#">[70]</a>              |

|                                    |                                    |           |      |              |
|------------------------------------|------------------------------------|-----------|------|--------------|
|                                    |                                    | long term | ≥ 65 | [42, 92]     |
|                                    |                                    | >6 month  | ≥ 65 | [75]         |
|                                    |                                    | >1 month  | ≥ 65 | [43, 68, 77] |
| Long-acting Benzodiazepine         | Agitation in dementia              |           | ≥ 65 | [93]         |
|                                    | Anxiety                            | long term | ≥ 65 | [93]         |
|                                    | Insomnia                           |           | ≥ 65 | [93]         |
| Intermediate acting benzodiazepine | -                                  | >1 month  | ≥ 65 | [48]         |
| Short acting benzodiazepine        | -                                  | >1 month  | ≥ 65 | [41, 73]     |
| Alprazolam                         | -                                  | >1 month  | ≥ 65 | [41]         |
| Oxazepam                           | -                                  | >1 month  | ≥ 65 | [41, 47]     |
| Triazolam                          | -                                  | >1 month  | ≥ 65 | [41]         |
| Triazolam                          | to treat insomnia                  | long term | ≥ 65 | [93]         |
| Chlorazepate                       | -                                  | >1 month  | ≥ 65 | [83]         |
| Chlordiazepoxide                   | -                                  | >1 month  | ≥ 65 | [83]         |
| Diazepam                           | -                                  | >1 month  | ≥ 65 | [83]         |
| Flurazepam                         | -                                  | >1 month  | ≥ 65 | [83]         |
| Z-drugs                            | not receiving on a long-term basis | ≥21 days  | ≥ 65 | [10]         |
|                                    | Depression                         | ≥21 days  | ≥ 65 | [10]         |
|                                    |                                    | >1 month  | -    | [15]         |
|                                    |                                    | >1 month  | -    | [15]         |
|                                    |                                    | >1 month  | ≥ 45 | [70]         |
|                                    |                                    |           | ≥ 65 | [48, 73]     |
|                                    |                                    | long term | ≥ 65 | [42]         |
| Barbiturates                       | to treat insomnia                  | long term | ≥ 65 | [93]         |
| Phenobarbital                      | -                                  | long term | ≥ 65 | [47]         |
| First-generation antihistamine     | -                                  | > 1 week  | ≥ 65 | [43, 47]     |
| Chlorpheniramine                   | -                                  | > 1 week  | ≥ 65 | [83]         |
| Clemastine                         | -                                  | > 1 week  | ≥ 65 | [83]         |
| Doxylamine                         | -                                  | > 1 week  | ≥ 65 | [83]         |
| Tripolidine                        | -                                  | > 1 week  | ≥ 65 | [83]         |

**Table 28: Inappropriate Duration (Non-specific psychotropics)**

| Class/Medication           | Condition | Duration  | Age  | References |
|----------------------------|-----------|-----------|------|------------|
| Four or more Psychotropics | -         | >3 months | 6–17 | [69]       |

**Table 29: Inappropriate Duration (non-mental health medication with mental health condition)**

| Class/Medication | Condition                 | Duration  | Age  | References |
|------------------|---------------------------|-----------|------|------------|
| Opioids          | Dementia (non-palliative) | long term | ≥ 65 | [43]       |

**Table 30: Inappropriate Duration (Anticholinergics)**

| Class/Medication                        | Condition | Duration  | Age  | References |
|-----------------------------------------|-----------|-----------|------|------------|
| Belladonna alkaloids <sup>a</sup>       | -         | >3 months | ≥ 65 | [41]       |
| Clidinium-chlordiazepoxide <sup>a</sup> | -         | >3 months | ≥ 65 | [41]       |
| Dicyclomine <sup>a</sup>                | -         | >3 months | ≥ 65 | [41]       |
| Propantheline <sup>a</sup>              | -         | >3 months | ≥ 65 | [41]       |

<sup>a</sup>. These medications were included because they can be used to treat some of the side effects caused by mental health medications.

### Inappropriate dose

Prescribing [Medication] at a dose [Dose] +/- to a patient with [Condition] +/- and aged [Age]

**Table 31: Inappropriate dose (Antipsychotics)**

| Medication (dose)                                 | Condition                     | Age  | References   |
|---------------------------------------------------|-------------------------------|------|--------------|
| Aripiprazole (2-15 mg/day)                        | BPSD: paranoia, hallucination | ≥ 65 | [101]        |
| Clozapine (10-50 mg/day)                          | BPSD: paranoia, hallucination | ≥ 65 | [101]        |
| Haloperidol (>2 mg)                               |                               | ≥ 65 | [45-47]      |
| Haloperidol (>3 mg/day)                           |                               | ≥ 65 | [41]         |
| Haloperidol (>5 mg/day)                           |                               | ≥ 65 | [46]         |
| Haloperidol (initially 0.5 mg/day, max. 3 mg/day) | BPSD: paranoia, hallucination | ≥ 65 | [101]        |
| Melperone (25-150 mg/day)                         | BPSD: paranoia, hallucination | ≥ 65 | [101]        |
| Melperone (25-150 mg/day)                         | BPSD: restlessness, agitation | ≥ 65 | [101]        |
| Olanzapine (>10 mg)                               |                               | ≥ 65 | [45, 46, 77] |
| Pipamperone (20-120 mg/day)                       | BPSD: restlessness, agitation | ≥ 65 | [101]        |
| Quetiapine (25-200 mg/day)                        | BPSD: paranoia, hallucination | ≥ 65 | [101]        |
| Quetiapine (25-200 mg/day)                        | BPSD: restlessness, agitation | ≥ 65 | [101]        |
| Reserpine (>0.1 mg/day)                           |                               | ≥ 65 | [34]         |



|                                                                                                                                      |                               |      |       |
|--------------------------------------------------------------------------------------------------------------------------------------|-------------------------------|------|-------|
| <i>Risperidone (initially 0.5-1 mg/day)</i>                                                                                          | BPSD: paranoia, hallucination | ≥ 65 | [101] |
| <i>Risperidone (initially 0.5-1 mg/day, Maximum 3 mg/day)</i>                                                                        | BPSD: restlessness, agitation | ≥ 65 | [101] |
| <i>Risperidone (1 mg BID)</i>                                                                                                        | Dementia and agitation        | ≥ 75 | [107] |
| <i>Thioridazine (&gt;30mg/day)</i>                                                                                                   |                               | ≥ 65 | [41]  |
| <b>High dose antipsychotics</b><br><i>total daily dose is above the maximum recommended by the British National Formulary (BNF).</i> |                               | -    | [22]  |

BID: twice a day. BPSD: Behavioural and Psychological Symptoms of Dementia

**Table 32: Inappropriate dose (Antidepressants)**

| Medication (dose)                    | Condition                     | Age  | References |
|--------------------------------------|-------------------------------|------|------------|
| <i>Citalopram (10-30mg)</i>          | BPSD: restlessness, agitation | ≥ 65 | [101]      |
| <i>Doxepin (&gt;6 mg/day)</i>        |                               | ≥ 65 | [34, 84]   |
| <i>Doxepin (25-50 mg)</i>            | BPSD: sleep disorders         | ≥ 65 | [101]      |
| <i>Fluoxetine (&gt;40 mg/day)</i>    |                               | ≥ 65 | [41]       |
| <i>Imipramine (&gt;100 mg/day)</i>   |                               | ≥ 65 | [41]       |
| <i>Trazodone (50-200 mg/day)</i>     | BPSD: restlessness, agitation | ≥ 65 | [101]      |
| <i>Trimipramine (&gt;100 mg/day)</i> |                               | ≥ 65 | [41]       |
| <i>Mirtazapine (15-45mg/day)</i>     | BPSD: depression              | ≥ 65 | [101]      |
| <i>Mirtazapine (15-30mg/day)</i>     | BPSD: sleep disorders         | ≥ 65 | [101]      |

**Table 33: Inappropriate dose (Mood stabilisers)**

| Medication (dose)                      | Age | References |
|----------------------------------------|-----|------------|
| <i>Valproate (&lt;1 g/day)</i>         | -   | [22]       |
| <i>Carbamazepine (&lt; 600 mg/day)</i> | -   | [22]       |

**Table 34: Inappropriate dose (ADHD medications)**

| Medication (dose)                                                 | Age      | References |
|-------------------------------------------------------------------|----------|------------|
| <i>SR Methylphenidate two doses per day, rather than one dose</i> | Children | [103]      |

SR: sustained release

**Table 35: Inappropriate dose (Sedatives, hypnotics and anxiolytics)**

| Medication (dose)                        | Condition                     | Age  | References       |
|------------------------------------------|-------------------------------|------|------------------|
| <i>Alprazolam (&gt;2 mg/day)</i>         |                               | ≥ 65 | [39, 47, 68]     |
| <i>Alprazolam (&gt;2 mg/day)</i>         |                               | ≥ 75 | [87]             |
| <i>Alprazolam (&gt;0.75 mg/day)</i>      |                               | ≥ 65 | [41]             |
| <i>Bromazepam (&gt; 1,5 mg)</i>          |                               | ≥ 65 | [47]             |
| <i>Brotizolam (&gt;0.125 mg/day)</i>     |                               | ≥ 65 | [45, 46]         |
| <i>Clomethiazole (5-15 mg/day)</i>       | BPSD: restlessness, agitation | ≥ 65 | [101]            |
| <i>Clotiazepam (&gt;5 mg/day)</i>        |                               | ≥ 75 | [87]             |
| <i>Clotiazepam (&gt;5 mg/day)</i>        |                               | ≥ 65 | [46]             |
| <i>Gabapentin (&gt;1400mg/day)</i>       | CrCl 30-59 mL/min             | -    | [72]             |
| <i>Gabapentin (&gt;700mg/day)</i>        | CrCl 15-29 mL/min             | -    | [72]             |
| <i>Gabapentin (&gt;300mg/day)</i>        | CrCl 10-14 mL/min             | -    | [72]             |
| <i>Gabapentin (&gt;150mg/day)</i>        | CrCl < 10 mL/min              | -    | [72]             |
| <i>Loprazolam (&gt;0.5 mg/day)</i>       |                               | ≥ 75 | [87]             |
| <i>Loprazolam (&gt;0.5 mg/day)</i>       |                               | ≥ 65 | [46]             |
| <i>Lorazepam (&gt;1 mg/day)</i>          |                               | ≥ 65 | [46]             |
| <i>Lorazepam (&gt; 2 mg/day)</i>         |                               | ≥ 65 | [45]             |
| <i>Lorazepam (&gt;3 mg/day)</i>          |                               | ≥ 75 | [87]             |
| <i>Lorazepam (&gt;3 mg/day)</i>          |                               | ≥ 65 | [39, 41, 68]     |
| <i>Lormetazepam (&gt;0.5 mg/day)</i>     |                               | ≥ 75 | [87]             |
| <i>Lormetazepam (&gt;0.5 mg/day)</i>     |                               | ≥ 65 | [45, 46]         |
| <i>Melatonin SR (2-4 mg)</i>             | BPSD: sleep disorders         | ≥ 65 | [101]            |
| <i>Oxazepam (&gt;30 mg/day)</i>          |                               | ≥ 70 | [95, 96]         |
| <i>Oxazepam (&gt;30 mg/day)</i>          |                               | ≥ 65 | [47]             |
| <i>Oxazepam (&gt;60 mg/day)</i>          |                               | ≥ 65 | [39, 45, 46, 68] |
| <i>Oxazepam (&gt;60 mg/day)</i>          |                               | ≥ 75 | [87]             |
| <i>Oxazepam unit dose &gt;30 mg</i>      |                               | ≥ 65 | [41]             |
| <i>Pregabalin (&gt;300mg/day)</i>        | CrCl 30-59 mL/min             | -    | [72]             |
| <i>Pregabalin (&gt;150mg/day)</i>        | CrCl 15-29 mL/min             | -    | [72]             |
| <i>Pregabalin (&gt;75mg/day)</i>         | CrCl < 15 mL/min              | -    | [72]             |
| <i>Temazepam (&gt;15 mg/day)</i>         |                               | ≥ 65 | [39, 68]         |
| <i>Temazepam (&gt;15 mg/day)</i>         |                               | ≥ 75 | [87]             |
| <i>Temazepam (&gt;30 mg/day)</i>         |                               | ≥ 65 | [41]             |
| <i>Triazolam (&gt;0.25 mg/day)</i>       |                               | ≥ 65 | [39, 66, 68]     |
| <i>Triazolam (&gt;0.25 mg unit dose)</i> |                               | ≥ 65 | [41]             |
| <i>Triazolam (&gt;0.25 mg/day)</i>       |                               | ≥ 75 | [87]             |
| <i>Triazolam (&gt;0.125 mg/day)</i>      |                               | ≥ 65 | [41]             |
| <i>Zaleplon (&gt;5 mg/day)</i>           |                               | ≥ 65 | [45, 46]         |

|                          |                       |      |         |
|--------------------------|-----------------------|------|---------|
| Zolpidem (>5 mg/day)     |                       | ≥ 65 | [45-47] |
| Zolpidem (>5 mg/day)     |                       | ≥ 75 | [87]    |
| Zopiclone (>3.75 mg/day) |                       | ≥ 75 | [87]    |
| Zopiclone (>3.75 mg/day) |                       | ≥ 65 | [45-47] |
| Zopiclone (>5 mg/day)    |                       | ≥ 70 | [95]    |
| Zopiclone (>7.5mg/day)   |                       | ≥ 70 | [96]    |
| Zopiclone (3.75-7.5 mg)  | BPSD: sleep disorders | ≥ 65 | [101]   |

BPSD: Behavioural and Psychological Symptoms of Dementia. CrCl: Creatinine Clearance

### Monitoring

Prescribing [Class/Medication] with monitoring [Test] [Frequency]

**Table 36: Monitoring (Antipsychotics)**

| Medication/Class      | Test    | Age                             | Frequency                         | References |
|-----------------------|---------|---------------------------------|-----------------------------------|------------|
| <i>Antipsychotics</i> | Glucose | -                               | Annually                          | [39]       |
|                       |         | -                               | 3-4 months after starting therapy | [49]       |
|                       | Weight  | -                               | Annual                            | [39]       |
|                       |         | -                               | 3-4 months after starting therapy | [49]       |
| Lipid profile         | -       | 3 months after starting therapy | [49]                              |            |
| <i>Clozapine</i>      | WBC     | ≥ 65                            | NR                                | [92]       |
|                       |         | -                               | NR                                | [117]      |

**Table 37: Monitoring (mood stabilisers)**

| Medication/Class     | Test                | Age                                              | Frequency                                                                                                                              | References   |
|----------------------|---------------------|--------------------------------------------------|----------------------------------------------------------------------------------------------------------------------------------------|--------------|
| <i>Carbamazepine</i> | AST, ALT            | -                                                | Baseline and annually                                                                                                                  | [113]        |
|                      |                     | -                                                | Annually                                                                                                                               | [105]        |
|                      | LFT                 | -                                                | Annually                                                                                                                               | [81]         |
|                      |                     | -                                                | Baseline, monthly for 3 months, and annually                                                                                           | [113]        |
|                      | FBC                 | -                                                | Annual                                                                                                                                 | [81, 105]    |
|                      |                     | -                                                | Baseline and periodically                                                                                                              | [50]         |
|                      |                     | ≥ 65                                             | Weekly during the first month of therapy, at least monthly during the next 5 months of therapy, and at least every 6 months thereafter | [38]         |
|                      |                     | -                                                | Annually                                                                                                                               | [81, 105]    |
|                      | Carbamazepine level | ≥ 65                                             | Every 6 months                                                                                                                         | [38]         |
|                      |                     | -                                                | 2-4 weeks after initiation, with changing clinical status, and annually                                                                | [113]        |
| -                    |                     | Every 6 months                                   | [50]                                                                                                                                   |              |
| <i>Valproate</i>     | LFT                 | -                                                | Every 3 months                                                                                                                         | [61]         |
|                      |                     | -                                                | Annually                                                                                                                               | [81]         |
|                      | AST of ALT          | -                                                | First 6 months of therapy                                                                                                              | [49]         |
|                      |                     | -                                                | Baseline, every 2 months for 6 months, and annually                                                                                    | [113]        |
|                      | FBC                 | -                                                | Annually                                                                                                                               | [81, 113]    |
|                      |                     | -                                                | First 6 months of therapy                                                                                                              | [49]         |
|                      | Valproate level     | -                                                | Annually                                                                                                                               | [81]         |
|                      |                     | -                                                | At 2-4 weeks After initiation, with changing clinical status, and annually                                                             | [113]        |
| ≥ 65                 |                     | Every 6 months                                   | [38]                                                                                                                                   |              |
| -                    |                     | Every 6 months                                   | [49, 50]                                                                                                                               |              |
| <i>Lithium</i>       | lithium level       | -                                                | Annually                                                                                                                               | [81, 105]    |
|                      |                     | -                                                | Every 3 months                                                                                                                         | [17, 61]     |
|                      |                     | -                                                | Every 6 months                                                                                                                         | [10, 49, 50] |
|                      |                     | ≥ 65                                             | Every 3 months                                                                                                                         | [38]         |
|                      |                     | ≥ 65                                             | Every month                                                                                                                            | [38]         |
|                      |                     | ≥ 65                                             | NR                                                                                                                                     | [92]         |
|                      |                     | -                                                | 2-4 weeks after initiation, with changing clinical status, and annually                                                                | [113]        |
|                      | TFT                 | -                                                | Annually                                                                                                                               | [61, 81]     |
|                      |                     | ≥ 65                                             | NR                                                                                                                                     | [92]         |
|                      |                     | -                                                | Every 6 months                                                                                                                         | [49]         |
|                      |                     | -                                                | Baseline, 3 and 6 month and annually                                                                                                   | [113]        |
|                      |                     | ≥ 65                                             | Every 6 months                                                                                                                         | [38]         |
|                      |                     | -                                                | NR                                                                                                                                     | [92]         |
| TSH                  | -                   | Annually                                         | [81]                                                                                                                                   |              |
|                      | -                   | Baseline, 1 month after stabilized, and annually | [113]                                                                                                                                  |              |
|                      | -                   | Annually                                         | [105]                                                                                                                                  |              |
|                      | -                   | Baseline, 1 month after stabilized, and annually | [113]                                                                                                                                  |              |
|                      | -                   | Annual                                           | [81, 105]                                                                                                                              |              |

|                |      |                |      |
|----------------|------|----------------|------|
|                | ≥ 65 | Every 3 months | [38] |
| Renal function | ≥ 65 | NR             | [92] |
| Urinalysis     | -    | Annually       | [81] |

ALT: Alanine transaminase. AST: Aspartate transaminase. Ca: Calcium. FBC: Full blood count. K<sup>+</sup>: Potassium. Na: Sodium. LFT: Liver function test. NR: Not reported. TFT: Thyroid function test. TSH: Thyroid stimulating hormone.

**Table 38: Monitoring (ADHD medications)**

| Medication/Class       | Test                             | Age      | Frequency | References |
|------------------------|----------------------------------|----------|-----------|------------|
| <i>Methylphenidate</i> | Growth chart (height and weight) | Children | NR        | [103]      |

NR: not reported

**Table 39: Monitoring (Sedative, hypnotics and anxiolytics)**

| Medication/Class     | Test                | Age | Frequency                                                               | References |
|----------------------|---------------------|-----|-------------------------------------------------------------------------|------------|
| <i>Phenobarbital</i> | AST of ALT          | -   | at Baseline and every 6 months                                          | [113]      |
|                      | CBC                 | -   | at Baseline and every 6 months                                          | [113]      |
|                      | Phenobarbital Level | -   | at 2-4 week After initiation, with changing clinical status, and yearly | [113]      |

### Omission

Patient with [Condition +/- Age] NOT prescribed [Class/Medication]

**Table 40: Omission**

| Medication/Class                             | Condition                                                               | Age   | References |
|----------------------------------------------|-------------------------------------------------------------------------|-------|------------|
| <i>Acetylcholinesterase inhibitor</i>        | Mild- moderate Alzheimer's dementia                                     | ≥ 65  | [25]       |
|                                              | Lewy Body dementia                                                      | ≥ 65  | [25]       |
| <i>Antidepressants</i>                       | Moderate/severe depressive symptoms lasting at least three months       | ≥ 65  | [43]       |
| <i>Non-TCA Antidepressants</i>               | Major depressive symptoms.                                              | ≥ 65  | [25]       |
| <i>SSRI</i>                                  | Persistent severe anxiety that interferes with independent functioning. | ≥ 65  | [25]       |
| <i>SSRI first line</i>                       | Depression                                                              | -     | [71]       |
| <i>Mood stabilisers</i>                      | on antidepressants for acute bipolar depression                         | Adult | [49]       |
| <i>Lithium OR Valproate OR Carbamazepine</i> | on lamotrigine and SSRI in bipolar disorder                             | Adult | [49]       |

SSRI: Selective serotonin reuptake inhibitor. TCA: Tricyclic antidepressants.

### Other inappropriate prescribing indicators

**Table 41: Other inappropriate prescribing indicators**

| Class                                                                                                         | Indicator                                                                                                                                    | Age      | References |
|---------------------------------------------------------------------------------------------------------------|----------------------------------------------------------------------------------------------------------------------------------------------|----------|------------|
| <i>Antidepressants</i>                                                                                        | TCA prescribed as first-line treatment of depression.                                                                                        | ≥ 65     | [25]       |
|                                                                                                               | TCA prescribed as first-line treatment of depression.                                                                                        | ≥ 45     | [70]       |
|                                                                                                               | Continued treatment for depression in spite of lacking indication.                                                                           | ≥ 65     | [92]       |
|                                                                                                               | Discontinuation of antidepressant, which leads to withdrawal symptoms                                                                        | ≥ 65     | [92]       |
|                                                                                                               | TCA in combination with anticholinergic agents in patient with nocturnal enuresis                                                            | children | [103]      |
|                                                                                                               | TCA prescribed as a first-line treatment with nocturnal enuresis                                                                             | children | [103]      |
|                                                                                                               | TCA except in case of severe depression or in low dose for neuropathic pain                                                                  | ≥ 65     | [42]       |
| <i>Antipsychotics</i>                                                                                         | Patient diagnosed with acute bipolar depression is prescribed antidepressant monotherapy                                                     | Adult    | [49]       |
|                                                                                                               | Risperidone continued following discharge without follow-up to a patient with dementia                                                       | ≥ 75     | [107]      |
|                                                                                                               | Phenothiazines as first-line treatment                                                                                                       | ≥ 65     | [25]       |
|                                                                                                               | Neuroleptics as hypnotics, unless sleep disorder is due to psychosis or dementia                                                             | ≥ 65     | [25]       |
| <i>Mood stabilisers</i>                                                                                       | Prescribing older antipsychotic to a patient with Parkinsonian and mild cognitive impairment and mild to moderate agitation in the evening   | ≥ 75     | [107]      |
|                                                                                                               | Lithium dose not adjusted or omitted in a patient with a lithium concentration above the therapeutic range (>1. - mmol l-1)                  | -        | [15]       |
|                                                                                                               | Lithium prescribed in conjunction with newly prescribed nonsteroidal anti-inflammatory drugs without dose adjustment or increased monitoring | -        | [15]       |
|                                                                                                               | Lithium therapy prescribed in conjunction with newly prescribed loop or thiazide diuretics without dose adjustment or increased monitoring   | -        | [15]       |
|                                                                                                               | Patient treated with ECT in bipolar disorder and with lithium dose NOT stopped or reduced                                                    | Adult    | [49]       |
|                                                                                                               | Patient treated with lithium in bipolar disorder does NOT have a serum level 0.8–1.1 mmol/L                                                  | Adult    | [49]       |
| Patient on lithium in bipolar disorder and with lithium serum level [1.5 mmol/L) has lithium not discontinued | Adult                                                                                                                                        | [49]     |            |

|                                   |                                                                                                                                                                                                                                                                            |       |      |
|-----------------------------------|----------------------------------------------------------------------------------------------------------------------------------------------------------------------------------------------------------------------------------------------------------------------------|-------|------|
|                                   | In bipolar disorder, Patient who has discontinued lithium, does NOT have a recorded gradual reduction of lithium dose over at least 4 weeks                                                                                                                                | Adult | [49] |
|                                   | Patient treated with divalproex in bipolar disorder does NOT have a serum level of 400–700 mmol/L                                                                                                                                                                          | Adult | [49] |
| <i>Non-Specific Psychotropics</i> | Patient on a monotherapy regimen for the acute management of depressive bipolar disorder NOT taking Lithium OR Lamotrigine OR Quetiapine OR Divalproex OR Lurasidone OR Carbamazepine OR Olanzapine OR ECT                                                                 | Adult | [49] |
|                                   | Patient on a monotherapy regimen for the acute management of depressive bipolar disorder taking Gabapentin OR Aripiprazole OR Ziprasidone                                                                                                                                  | Adult | [49] |
|                                   | Patient on combination therapy for the Acute management of depressive bipolar disorder taking adjunctive Ziprasidone OR Levetiracetam                                                                                                                                      | Adult | [49] |
|                                   | Three or more psychotropic drugs on an as required (PRN) basis.                                                                                                                                                                                                            | -     | [22] |
|                                   | Patient treated with lamotrigine and a second agent in bipolar disorder Is NOT prescribed Lithium OR Quetiapine OR Divalproex                                                                                                                                              | Adult | [49] |
|                                   | Patient treated with lithium and a second agent in bipolar disorder Is NOT prescribed Lamotrigine OR Quetiapine OR SSRI OR Bupropion OR Divalproex OR Olanzapine OR Risperidone OR MAOI OR Aripiprazole OR Ziprasidone OR Lurasidone OR Pramipexole OR Venlafaxine OR TCA" | Adult | [49] |
|                                   | Patient treated with quetiapine and treated with a second agent in bipolar disorder Is NOT prescribed Lamotrigine OR SSRI OR Lithium OR Divalproex                                                                                                                         | Adult | [49] |

ECT: Electroconvulsive therapy. SSRI: Selective serotonin reuptake inhibitor. TCA: Tricyclic antidepressants.
