# Supplementary material for: Identifying potential prescribing safety indicators related to mental health disorders and medications: A systematic review
Source: PubMed Central journal article supplement (PMC6534318; doi:10.1371/journal.pone.0217406), 2019-05-24
Supplement: pone.0217406.s003.pdf [file pone.0217406.s003.pdf]

## List of potential Prescribing Safety Indicators (PSIs) related to mental health medications and conditions

**Table 1: PIM: Independent of Diagnoses or Conditions (Prescribing [Class/Medication] to a patient aged [age])**

| PIM: Independent of Diagnoses or Conditions |                         |                                   |                             |                                |
|---------------------------------------------|-------------------------|-----------------------------------|-----------------------------|--------------------------------|
| Therapeutic Category                        | Medication/Class        | Age                               | References                  |                                |
| Antipsychotics                              | <i>Antipsychotics</i>   | ≥ 65                              | [25, 34, 38, 42, 43]        |                                |
|                                             |                         | 0–5                               | [69]                        |                                |
| Antidepressants                             | <i>Antidepressants</i>  | 0–5                               | [69]                        |                                |
|                                             |                         | TCA                               | ≥ 65                        | [32, 34, 38, 65]               |
|                                             |                         |                                   | ≤ 18                        | [103]                          |
|                                             |                         | <i>SSRI other than fluoxetine</i> | ≤ 18                        | [73, 103]                      |
|                                             |                         | <i>NDRI (Bupropion)</i>           | ≥ 65                        | [46]                           |
|                                             |                         | <i>NRI (Reboxetine)</i>           | ≥ 65                        | [46]                           |
|                                             |                         | <i>MAOi (Tranylcypromine)</i>     | ≥ 65                        | [45, 46, 77]                   |
| Sedative, hypnotics and anxiolytics         | <i>Benzodiazepine</i>   | ≥ 65                              | [25, 42, 43, 68]            |                                |
|                                             |                         | <i>Z-drugs</i>                    | ≥ 65                        | [25, 42]                       |
|                                             |                         | <i>Barbiturates</i>               | ≥ 65                        | [39, 118]                      |
|                                             |                         | <i>Meprobamate</i>                | ≥ 65                        | [34, 39, 41, 46, 66, 118]      |
|                                             |                         | <i>Sedating antihistamine</i>     | ≥ 65                        | [48]                           |
|                                             |                         | <i>Promethazine</i>               | ≥ 65                        | [34, 46, 47, 66, 91, 108, 118] |
|                                             |                         | ADHD medications                  | <i>All ADHD Medications</i> | < 6                            |
| <i>Clonidine</i>                            | ≥ 65                    |                                   |                             | [31, 34, 46, 48, 66, 91, 116]  |
| <i>Guanfacine</i>                           | ≥ 65                    |                                   |                             | [34, 46]                       |
| <i>Methylphenidate</i>                      | ≥ 65                    |                                   |                             | [46, 91]                       |
| Anticholinergics                            | <i>Anticholinergics</i> | ≥ 65                              | [38]                        |                                |

ADHD: Attention deficit hyperactivity disorder. MAOi: Monoamine oxidase inhibitor. NDRI: Norepinephrine–dopamine reuptake inhibitor. NRI: Norepinephrine reuptake inhibitor. SSRI: Selective serotonin reuptake inhibitor. TCA: Tricyclic antidepressants

**Table 2: PIM: considering diagnoses or conditions (Prescribing [Class/Medication] to a patient with [Condition] +/- and aged [age])**

| PIM: considering diagnoses or conditions |                                                            |                                                          |                                                          |                      |          |
|------------------------------------------|------------------------------------------------------------|----------------------------------------------------------|----------------------------------------------------------|----------------------|----------|
| Therapeutic Category                     | Condition                                                  | Medication/Class                                         | Age                                                      | References           |          |
| Antipsychotics                           | Dementia but Not Psychosis                                 | <i>Antipsychotics</i>                                    | ≥ 65                                                     | [73]                 |          |
|                                          | BPSD                                                       | <i>Antipsychotics</i>                                    | ≥ 65                                                     | [25, 34]             |          |
|                                          | Seizures or Epilepsy                                       | <i>Antipsychotics</i>                                    | ≥ 65                                                     | [116]                |          |
|                                          | Parkinson's Disease                                        | <i>Antipsychotics other than quetiapine or clozapine</i> | ≥ 65                                                     | [25, 32, 48, 73, 92] |          |
|                                          | History of prostatism or previous urinary retention of BPH | Glaucoma                                                 | <i>Antipsychotics</i>                                    | -                    | [71]     |
|                                          |                                                            |                                                          | <i>Fluphenazine</i>                                      | -                    | [71]     |
|                                          |                                                            |                                                          | <i>Perphenazine</i>                                      | -                    | [71]     |
|                                          | <i>Trifluoperazine</i>                                     | -                                                        | [71]                                                     |                      |          |
|                                          | Syncope                                                    | <i>Antipsychotics</i>                                    | ≥ 65                                                     | [84]                 |          |
|                                          | Postural Hypotension                                       | <i>Antipsychotics</i>                                    | ≥ 65                                                     | [84]                 |          |
|                                          | History of Falls                                           | <i>Antipsychotics</i>                                    | ≥ 65                                                     | [34, 47, 84]         |          |
|                                          | Delirium                                                   | <i>Antipsychotics</i>                                    | ≥ 65                                                     | [34, 84]             |          |
|                                          | ADHD without Hyperactivity                                 | <i>Antipsychotics</i>                                    | Children                                                 | [103]                |          |
|                                          | Arrhythmia                                                 | <i>Antipsychotics</i>                                    | ≥ 65                                                     | [116]                |          |
|                                          | Lewy Body Disease                                          | Chronic constipation                                     | <i>Antipsychotics other than quetiapine or clozapine</i> | ≥ 65                 | [25, 32] |
|                                          |                                                            |                                                          | <i>Perphenazine</i>                                      | -                    | [83]     |
|                                          |                                                            |                                                          | <i>Clozapine</i>                                         | ≥ 65                 | [83]     |
| <i>Haloperidol</i>                       |                                                            |                                                          | ≥ 65                                                     | [83]                 |          |
| <i>Olanzapine</i>                        | ≥ 65                                                       | [83]                                                     |                                                          |                      |          |
| Antidepressants                          | Heart block                                                | TCA                                                      | ≥ 65                                                     | [88, 93, 116]        |          |
|                                          | Cardiac conduction abnormalities                           | TCA                                                      | ≥ 65                                                     | [25, 43, 68]         |          |
|                                          | Cardiovascular risk factors or CVD                         | TCA                                                      | ≥ 65                                                     | [92]                 |          |

|                                            |                                                   |                                 |         |                       |
|--------------------------------------------|---------------------------------------------------|---------------------------------|---------|-----------------------|
|                                            | Heart failure                                     | TCA                             | -       | [11, 71, 73]          |
|                                            | Arrhythmia                                        | Amitriptyline at dose >75mg     | -       | [10]                  |
|                                            |                                                   | Venlafaxine                     |         | [71]                  |
|                                            | HTN                                               | Duloxetine                      | -       | [71]                  |
|                                            |                                                   | MAOIs                           |         | [71]                  |
|                                            | Postural hypotension                              | TCA                             | ≥ 65    | [88, 92, 93]          |
|                                            | Syncope                                           | TCA                             | ≥ 65    | [47, 116]             |
|                                            |                                                   | Amitriptyline                   |         | [83]                  |
|                                            | History of falls                                  | Clomipramine                    | ≥ 65    | [83]                  |
|                                            |                                                   | Imipramine                      |         | [83]                  |
|                                            |                                                   | SSRI                            | -       | [15, 71]              |
|                                            | Seizures or epilepsy                              | TCA                             | -       | [71]                  |
|                                            | Dementia or cognitive impairment                  | TCA                             | -       | [15]                  |
|                                            |                                                   | TCA                             | -       | [71]                  |
|                                            |                                                   | Mianserin                       | -       | [71]                  |
|                                            |                                                   | MAOI                            | -       | [71]                  |
|                                            | Glaucoma                                          | Citalopram                      | -       | [71]                  |
|                                            |                                                   | Escitalopram                    | -       | [71]                  |
|                                            |                                                   | Fluoxetine                      | -       | [71]                  |
|                                            |                                                   | Fluvoxamine                     | -       | [71]                  |
|                                            |                                                   | Paroxetine                      | -       | [71]                  |
|                                            | Prostatism or history of urinary retention or BPH | TCA                             | -       | [71]                  |
|                                            | Constipation                                      | TCA                             | ≥ 65    | [43, 47, 68, 88, 116] |
|                                            | Current or recent significant hyponatraemia       | SSRI                            | -       | [15]                  |
|                                            | Hepatic impairment or cirrhosis                   | TCA                             | -       | [71]                  |
|                                            |                                                   | Paroxetine                      |         | [85]                  |
|                                            | Gastrointestinal haemorrhage                      | Sertraline                      | ≥ 75    | [85]                  |
|                                            |                                                   | Fluvoxamine                     |         | [85]                  |
|                                            |                                                   | Escitalopram                    |         | [85]                  |
|                                            | Peptic ulcer disease                              | SSRI                            | -       | [71]                  |
|                                            |                                                   | Amitriptyline                   |         | [83]                  |
|                                            | Delirium                                          | Clomipramine                    | ≥ 65    | [83]                  |
|                                            |                                                   | Imipramine                      |         | [83]                  |
|                                            | Acute bipolar depression                          | TCA                             | Adults  | [49]                  |
| <b>Sedative, hypnotics and anxiolytics</b> | Dementia or cognitive impairment                  | Benzodiazepines                 | ≥ 65    | [34, 66, 84, 88]      |
|                                            | History of falls or fractures                     | Sedative-hypnotics              | ≥ 65    | [88]                  |
|                                            | Acute or chronic respiratory failure              | Benzodiazepines                 | ≥ 65    | [25]                  |
|                                            | Sleep apnoea syndrome                             | Benzodiazepines                 | ≥ 65    | [66, 116]             |
|                                            | Delirium                                          | Benzodiazepines                 | ≥ 65    | [34, 84]              |
|                                            | BPH                                               | Antihistamine                   | ≥ 65    | [116]                 |
|                                            | Advanced dementia                                 | Antihistamine 1st generation    | -       | [86]                  |
|                                            | Hepatic impairment or cirrhosis                   | Benzodiazepines                 | -       | [71]                  |
|                                            | Chronic constipation                              | antihistamines                  | ≥ 65    | [116]                 |
|                                            | <b>Mood stabilisers</b>                           | Renal failure                   | Lithium | -                     |
| Thyroid disorders                          |                                                   | Lithium                         | -       | [71]                  |
| Epilepsy                                   |                                                   | Lithium                         | -       | [71]                  |
| <b>Anti-dementia</b>                       | Persistent bradycardia                            | Acetylcholinesterase inhibitors | ≥ 65    | [25, 42]              |
|                                            | Heart block                                       | Acetylcholinesterase inhibitors | ≥ 65    | [25]                  |
|                                            | Recurrent unexplained syncope                     | Acetylcholinesterase inhibitors | ≥ 65    | [34]                  |
| <b>Anticholinergics</b>                    | Dementia or cognitive impairment                  | Anticholinergics                | -       | [39]                  |
|                                            | Delirium                                          | Anticholinergics                | ≥ 65    | [25, 32, 34, 42]      |
|                                            | Chronic constipation                              | Anticholinergics                | -       | [71]                  |
|                                            | Glaucoma                                          | Anticholinergics                | ≥ 65    | [25, 42, 47, 66, 88]  |

|                                            |                                     |                                              |       |                      |
|--------------------------------------------|-------------------------------------|----------------------------------------------|-------|----------------------|
| <b>ADHD medications</b>                    | History of urinary retention of BPH | <i>Anticholinergics</i>                      | -     | [50]                 |
|                                            | HTN                                 | <i>Atomoxetine</i>                           | -     | [71]                 |
|                                            | Anorexia and malnutrition           | <i>Methylphenidate</i>                       | ≥ 65  | [47]                 |
|                                            | Epilepsy                            | <i>Methylphenidate</i>                       | -     | [71]                 |
|                                            | Insomnia                            | <i>Amphetamine</i><br><i>Methylphenidate</i> | ≥ 65  | [34]<br>[34, 47, 84] |
| <b>Non-MH medication with MH condition</b> | Delirium                            | <i>H2-receptor antagonists</i>               | -     | [84]                 |
|                                            |                                     | <i>Corticosteroids</i>                       | ≥ 65  | [34]                 |
|                                            |                                     | <i>Meperidine (Pethidine)</i>                | ≥ 65  | [34, 84]             |
|                                            | Insomnia                            | <i>Pseudoephedrine</i>                       | -     | [34, 47, 84]         |
|                                            |                                     | <i>Phenylephrine</i>                         | -     | [34, 47, 84]         |
|                                            |                                     | <i>Armodafinil</i>                           | ≥ 65  | [34]                 |
|                                            |                                     | <i>Modafinil</i>                             | -     | [34]                 |
|                                            |                                     | <i>Theophylline</i>                          | -     | [34, 84]             |
| Depression                                 | <i>Methylidopa</i>                  | ≥ 65                                         | [116] |                      |
| Dementia or cognitive impairment           | <i>Selegiline</i>                   | ≥ 65                                         | [101] |                      |

ADHD: Attention deficit hyperactivity disorder. BPH: Benign prostatic hyperplasia. BPSD: Behavioural and Psychological Symptoms of Dementia. CVD: Cardiovascular disease. HTN: Hypertension. MAOI: Monoamine oxidase inhibitor. MH: Mental health. SSRI: Selective serotonin reuptake inhibitor. TCA: Tricyclic antidepressants.

**Table 3: Drug-drug interactions (Prescribing [Class/Medication] with [Class/Medication] +/- to a patient aged [age])**

| Drug-drug interactions                     |                                |                                    |               |              |
|--------------------------------------------|--------------------------------|------------------------------------|---------------|--------------|
| Therapeutic Category                       | Medication/Class               | Medication/Class                   | Age           | References   |
| <b>Antipsychotics</b>                      | <i>Antipsychotics</i>          | <i>Antipsychotic</i>               | -             | [22, 71]     |
|                                            |                                | <i>Antiparkinsonian agents</i>     | ≥ 65          | [44]         |
|                                            | <i>Pimozide</i>                | <i>Macrolides antibiotics</i>      | -             | [89]         |
|                                            |                                | <i>Azole antifungal</i>            | -             | [89]         |
| <b>Antidepressants</b>                     | <i>TCA</i>                     | <i>MAO</i>                         | -             | [15]         |
|                                            |                                | <i>TCA</i>                         | ≥ 65          | [41, 112]    |
|                                            |                                | <i>Cimetidine</i>                  | -             | [111]        |
|                                            |                                | <i>Fluoxetine</i>                  | -             | [111]        |
|                                            |                                | <i>Fluvoxamine</i>                 | ≥ 70          | [96]         |
|                                            |                                | <i>Paroxetine</i>                  | -             | [111]        |
|                                            |                                | <i>Selegiline</i>                  | -             | [102]        |
|                                            |                                | <i>Tramadol</i>                    | -             | [15]         |
|                                            |                                | <i>Aspirin (no protection)</i>     | -             | [15]         |
|                                            |                                | <i>MAOI</i>                        | -             | [89]         |
|                                            | <i>SSRI</i>                    | <i>SSRI's</i>                      | ≥ 65          | [25, 43, 68] |
|                                            |                                | <i>NSAID (no protection)</i>       | ≥ 45          | [70]         |
|                                            |                                | <i>Venlafaxine</i>                 | ≥ 45          | [70]         |
|                                            |                                | <i>Vitamin K antagonists</i>       | -             | [71]         |
|                                            |                                | <i>Selegiline</i>                  | -             | [111]        |
|                                            |                                | <i>Tramadol</i>                    | -             | [15]         |
|                                            | <i>MAO</i>                     | <i>Dextromethorphan</i>            | -             | [89]         |
|                                            |                                | <i>Amphetamine and derivatives</i> | -             | [102]        |
|                                            |                                | <i>Narcotic analgesics</i>         | -             | [102]        |
|                                            |                                | <i>Triptans</i>                    | -             | [102]        |
| <i>Levodopa</i>                            |                                | -                                  | [104]         |              |
| <i>MAOI</i>                                |                                | ≥ 65                               | [41, 112]     |              |
| <i>Amitriptyline</i>                       |                                | <i>Sertraline</i>                  | children      | [79]         |
|                                            |                                | <i>Trazodone</i>                   | children      | [79]         |
| <i>Citalopram</i>                          | <i>QT-prolonging drugs</i>     | -                                  | [15]          |              |
| <i>Citalopram</i>                          | <i>Linezolid</i>               | children                           | [79]          |              |
| <i>Sertraline</i>                          | <i>Theophylline</i>            | -                                  | [89]          |              |
| <i>Fluvoxamine</i>                         | <i>Ramelteon</i>               | -                                  | [102]         |              |
| <i>Trazodone</i>                           | <i>anti-HCV antivirals</i>     | -                                  | [71]          |              |
| <i>Escitalopram</i>                        | <i>anti-HCV antivirals</i>     | -                                  | [71]          |              |
| <i>Hypnotic or sedative Benzodiazepine</i> | <i>Hypnotic or sedative</i>    | ≥ 65                               | [32, 41, 112] |              |
|                                            | <i>Azole antifungal agents</i> | -                                  | [89]          |              |

|                                            |                                 |                                                                               |                         |                  |       |
|--------------------------------------------|---------------------------------|-------------------------------------------------------------------------------|-------------------------|------------------|-------|
| <b>Sedative, hypnotics and anxiolytics</b> |                                 | <i>Cimetidine</i>                                                             | ≥ 65                    | [116]            |       |
|                                            |                                 | <i>Benzodiazepines</i>                                                        | -                       | [71]             |       |
|                                            |                                 | <i>Alprazolam</i>                                                             |                         | [48]             |       |
|                                            |                                 | <i>Midazolam</i>                                                              | Strong CYP3A4 inhibitor | ≥ 65             | [48]  |
|                                            |                                 | <i>Triazolam</i>                                                              |                         | [48]             |       |
|                                            |                                 | <i>Flurazepam</i>                                                             |                         | [71]             |       |
|                                            |                                 | <i>Guazepam</i>                                                               |                         | [71]             |       |
|                                            |                                 | <i>Triazolam</i>                                                              | Anti-HCV antivirals     | -                | [71]  |
|                                            |                                 | <i>Alprazolam</i>                                                             |                         | [71]             |       |
|                                            |                                 | <i>Zolpidem</i>                                                               | Strong CYP3A4 inhibitor | ≥ 65             | [48]  |
|                                            |                                 | <i>Zopiclone</i>                                                              |                         | [48]             |       |
|                                            |                                 | <i>Zolpidem</i>                                                               | Anti-HCV antivirals     | -                | [71]  |
|                                            | <b>Mood stabilisers</b>         | <i>Valproic acid</i>                                                          | <i>Carbapenems</i>      | -                | [104] |
| <i>Lamotrigine</i>                         |                                 |                                                                               | Children                | [79]             |       |
| <i>Clarithromycin</i>                      |                                 |                                                                               | -                       | [109]            |       |
| <i>Erythromycin</i>                        |                                 |                                                                               | ≥ 45                    | [70]             |       |
| <i>Cimetidine</i>                          |                                 |                                                                               | ≥ 65                    | [116]            |       |
| <i>Carbamazepine</i>                       |                                 | <i>oral or intravaginal contraceptives, patches or pure progestogen pills</i> | -                       | [71]             |       |
|                                            |                                 | <i>Warfarin</i>                                                               | -                       | [111]            |       |
|                                            |                                 | <i>Propoxyphene</i>                                                           | -                       | [89, 111]        |       |
|                                            |                                 | <i>Rivaroxaban</i>                                                            | -                       | [71]             |       |
| <i>Lithium</i>                             |                                 | <i>ACEi</i>                                                                   | ≥ 65                    | [34]             |       |
|                                            |                                 | <i>NSAID</i>                                                                  | ≥ 65                    | [48]             |       |
|                                            |                                 | <i>Diuretics</i>                                                              | -                       | [49]             |       |
| <i>Lamotrigine</i>                         |                                 | <i>Hormonal contraceptive or combination pills</i>                            | -                       | [71]             |       |
| <b>Anti-dementia</b>                       | <i>Anticholinesterase drugs</i> | <i>Anticholinergic</i>                                                        | ≥ 65                    | [77]             |       |
|                                            |                                 | <i>Anticholinesterase drugs</i>                                               | -                       | [71]             |       |
| <b>Anticholinergic</b>                     | <i>Anticholinergic</i>          | <i>Anticholinergic</i>                                                        | ≥ 65                    | [25, 32, 34, 48] |       |
| <b>ADHD medications</b>                    | <i>Clonidine</i>                | <i>Propranolol</i>                                                            | -                       | [111]            |       |

ADHD: Attention deficit hyperactivity disorder. ACEi: Angiotensin-converting-enzyme inhibitor. CYP: Cytochrome P450. HCV: Hepatitis C virus. MAOi: Monoamine oxidase inhibitor. NSAID: Nonsteroidal anti-inflammatory drugs. SSRI: Selective serotonin reuptake inhibitor. TCA: Tricyclic antidepressants.

**Table 4: Inappropriate Duration (Prescribing [Class/Medication] for [duration] +/- to a patient with [condition] +/- and aged [age])**

| Therapeutic Category                       | Class/Medication                      | Inappropriate Duration       |           |        |              |
|--------------------------------------------|---------------------------------------|------------------------------|-----------|--------|--------------|
|                                            |                                       | Condition                    | Duration  | Age    | References   |
| <b>Antipsychotics</b>                      | <i>Antipsychotics</i>                 | Dementia but not psychosis   | >6 weeks  | ≥ 65   | [10]         |
|                                            |                                       | as long-term hypnotics       | >1 month  | ≥ 65   | [43, 47, 77] |
|                                            | <i>More than one Antipsychotics</i>   | -                            | >2 month  | Adults | [69]         |
| <b>Antidepressants</b>                     | <i>Three or more Antidepressants</i>  | -                            | >3 month  | adults | [69]         |
|                                            | <i>More than one SSRI</i>             | -                            | >2 month  | adults | [69]         |
|                                            | <i>SSRI and SNRI combination</i>      | -                            | >2 month  | adults | [69]         |
| <b>Sedative, hypnotics and anxiolytics</b> | <i>Hypnotics</i>                      | -                            | >1 month  | -      | [115]        |
|                                            | <i>Benzodiazepine</i>                 | -                            | >1 month  | -      | [15, 99]     |
|                                            | <i>Z-drugs</i>                        | -                            | >1 month  | -      | [15]         |
|                                            | <i>First-generation antihistamine</i> | -                            | > 1 week  | ≥ 65   | [43, 47]     |
| <b>Non-Specific Psychotropics</b>          | <i>Four or more Psychotropics</i>     | -                            | >3 months | 6–17   | [69]         |
| <b>Non-MH medication with MH condition</b> | <i>Opioids</i>                        | Dementia (unless palliative) | long term | ≥ 65   | [43]         |

MH: Mental health. SNRI: Serotonin and norepinephrine reuptake inhibitors. SSRI: Selective serotonin reuptake inhibitor.

**Table 5: Inappropriate dose (Prescribing [Medication] at a dose [Dose] +/- to a patient with [Condition] +/- and aged [Age])**

| Inappropriate dose                  |                              |                                                                                                        |                               |          |                  |
|-------------------------------------|------------------------------|--------------------------------------------------------------------------------------------------------|-------------------------------|----------|------------------|
| Therapeutic Category                | Medication                   | Dose                                                                                                   | Condition                     | Age      | References       |
| Antipsychotics                      | <i>Haloperidol</i>           | >2 mg/day                                                                                              |                               | ≥ 65     | [45-47]          |
|                                     | <i>Risperidone</i>           | 3 mg/day                                                                                               | BPSD: restlessness, agitation | ≥ 65     | [101]            |
|                                     | <i>Antipsychotics</i>        | High dose<br>Total daily dose is above the maximum recommended by the British National Formulary (BNF) |                               | -        | [22]             |
| Antidepressants                     | <i>Fluoxetine</i>            | >40 mg/day                                                                                             |                               | ≥ 65     | [41]             |
|                                     | <i>Imipramine</i>            | >100 mg/day                                                                                            |                               | ≥ 65     | [41]             |
|                                     | <i>Trimipramine</i>          | >100 mg/day                                                                                            |                               | ≥ 65     | [41]             |
| ADHD medications                    | SR<br><i>Methylphenidate</i> | two doses per day, rather than one dose                                                                |                               | Children | [103]            |
| Sedative, hypnotics and anxiolytics | <i>Alprazolam</i>            | >2 mg/day                                                                                              |                               | ≥ 65     | [39, 47, 68]     |
|                                     | <i>Brotizolam</i>            | >0.125 mg/day                                                                                          |                               | ≥ 65     | [45, 46]         |
|                                     | <i>Gabapentin</i>            | >1400mg/day                                                                                            | CrCl 30-59 mL/min             | -        | [72]             |
|                                     | <i>Gabapentin</i>            | >700mg/day                                                                                             | CrCl 15-29 mL/min             | -        | [72]             |
|                                     | <i>Gabapentin</i>            | >300mg/day                                                                                             | CrCl 10-14 mL/min             | -        | [72]             |
|                                     | <i>Gabapentin</i>            | >150mg/day                                                                                             | CrCl < 10 mL/min              | -        | [72]             |
|                                     | <i>Lorazepam</i>             | > 2 mg/day                                                                                             |                               | ≥ 65     | [45]             |
|                                     | <i>Lormetazepam</i>          | >0.5 mg/day                                                                                            |                               | ≥ 65     | [45, 46]         |
|                                     | <i>Oxazepam</i>              | >60 mg/day                                                                                             |                               | ≥ 65     | [39, 45, 46, 68] |
|                                     | <i>Pregabalin</i>            | >300mg/day                                                                                             | CrCl 30-59 mL/min             | -        | [72]             |
|                                     | <i>Pregabalin</i>            | >150mg/day                                                                                             | CrCl 15-29 mL/min             | -        | [72]             |
|                                     | <i>Pregabalin</i>            | >75mg/day                                                                                              | CrCl < 15 mL/min              | -        | [72]             |
|                                     | <i>Temazepam</i>             | >15 mg/day                                                                                             |                               | ≥ 65     | [39, 68]         |
|                                     | <i>Triazolam</i>             | >0.25 mg/day                                                                                           |                               | ≥ 65     | [39, 66, 68]     |
|                                     | <i>Zaleplon</i>              | >5 mg/day                                                                                              |                               | ≥ 65     | [45, 46]         |
| <i>Zolpidem</i>                     | >5 mg/day                    |                                                                                                        | ≥ 65                          | [45-47]  |                  |
| <i>Zopiclone</i>                    | >7.5mg/day                   |                                                                                                        | ≥ 70                          | [96]     |                  |

ADHD: Attention deficit hyperactivity disorder. BPSD: Behavioural and Psychological Symptoms of Dementia. CrCl: Creatinine clearance.

**Table 6: Monitoring (Prescribing [Class/Medication] with monitoring [Test] [Frequency])**

| Monitoring           |                        |                                  |                                 |                                   |            |           |
|----------------------|------------------------|----------------------------------|---------------------------------|-----------------------------------|------------|-----------|
| Therapeutic Category | Medication/Class       | Test                             | Age                             | Frequency                         | References |           |
| Antipsychotics       | <i>Antipsychotics</i>  | Glucose                          | -                               | Annually                          | [39]       |           |
|                      |                        |                                  |                                 | 3-4 months after starting therapy | [49]       |           |
|                      |                        | Weight                           | -                               | Annually                          | [39]       |           |
|                      |                        |                                  |                                 | 3-4 months after starting therapy | [49]       |           |
|                      | Lipid profile          | -                                | 3 months after starting therapy | [49]                              |            |           |
| Mood stabilisers     | <i>Clozapine</i>       | WBC                              | -                               | NR                                | [117]      |           |
|                      |                        | <i>Carbamazepine</i>             | LFT                             | -                                 | Annually   | [81]      |
|                      |                        |                                  | FBC                             | -                                 | Annually   | [81, 105] |
|                      |                        | Carbamazepine level              | -                               | Every 6 months                    | [50]       |           |
|                      | <i>Valproate</i>       | LFT                              | -                               | Annually                          | [81]       |           |
|                      |                        |                                  |                                 | first 6 months of therapy         | [49]       |           |
|                      |                        | FBC                              | -                               | Annually                          | [81, 113]  |           |
|                      | <i>Lithium</i>         | lithium level                    | -                               | every 3 months                    | [17, 61]   |           |
|                      |                        |                                  |                                 | every 6 months                    | [49]       |           |
| annually             |                        |                                  |                                 | [81, 105]                         |            |           |
| ADHD medications     | <i>Methylphenidate</i> | Growth chart (height and weight) | Children                        | NR                                | [103]      |           |

ADHD: Attention deficit hyperactivity disorder. FBC: Full blood count. LFT: Liver function test. NR: Not reported. TFT: Thyroid function test. WBC: White blood count

**Table 7: Omission (Patient with [Condition +/- Age] NOT prescribed [Class/Medication])**

| Omission             |                                       |                                                                         |       |            |
|----------------------|---------------------------------------|-------------------------------------------------------------------------|-------|------------|
| Therapeutic Category | Medication/Class                      | Condition                                                               | Age   | References |
| Anti-dementia        | <i>Acetylcholinesterase inhibitor</i> | Mild- moderate Alzheimer's dementia                                     | ≥ 65  | [25]       |
|                      |                                       | Lewy Body dementia                                                      |       | [25]       |
| Antidepressants      | <i>Antidepressants</i>                | moderate/severe depressive symptoms lasting at least three months       | ≥ 65  | [43]       |
|                      | <i>SSRI</i>                           | Persistent severe anxiety that interferes with independent functioning. | ≥ 65  | [25]       |
| Mood stabilisers     | <i>Mood stabilisers</i>               | on antidepressants for acute bipolar depression                         | Adult | [49]       |

SSRI: Selective serotonin reuptake inhibitor

**Table 8: Other**

| Therapeutic Category       | Indicator                                                                                                                                    | Age   | References |
|----------------------------|----------------------------------------------------------------------------------------------------------------------------------------------|-------|------------|
| Antidepressants            | TCA except in case of severe depression or in low dose for neuropathic pain                                                                  | ≥ 65  | [42]       |
|                            | Patient diagnosed with acute bipolar depression is prescribed antidepressant monotherapy                                                     | Adult | [49]       |
| Antipsychotics             | Risperidone continued following discharge without follow-up to a patient with dementia                                                       | ≥ 75  | [107]      |
| Mood stabilisers           | Lithium dose not adjusted or omitted in a patient with a lithium concentration above the therapeutic range (>1. - mmol l-1)                  | -     | [15]       |
|                            | Lithium prescribed in conjunction with newly prescribed nonsteroidal anti-inflammatory drugs without dose adjustment or increased monitoring | -     | [15]       |
|                            | Lithium therapy prescribed in conjunction with newly prescribed loop or thiazide diuretics without dose adjustment or increased monitoring   | -     | [15]       |
|                            | Patient treated with lithium in bipolar disorder does NOT have a serum level 0.8–1.1 mmol/L                                                  | Adult | [49]       |
|                            | Patient on lithium in bipolar disorder and with lithium serum level [1.5 mmol/L) has lithium not discontinued                                | Adult | [49]       |
| Non-Specific Psychotropics | In bipolar disorder, Patient who has discontinued lithium, does NOT have a recorded gradual reduction of lithium dose over at least 4 weeks  | Adult | [49]       |
|                            | Three or more psychotropic drugs on an as required (PRN) basis.                                                                              | -     | [22]       |

TCA: Tricyclic antidepressants.
